# Supplementary material for: Phylogenomics of Psammodynastes and Buhoma (Elapoidea: Serpentes), with the description of a new Asian snake family
Source: Springer Nature journal article supplement (doi:10.1038/s41598-024-60215-2), 2024-04-25
Supplement: 41598_2024_60215_MOESM1_ESM.pdf [file 41598_2024_60215_MOESM1_ESM.pdf]

## Supplementary Information

Das, S., Greenbaum, E., Brecko, J., Pauwels, O. S. G., Ruane, S., Pirro, S. & Merilä, J.

Resolving the elapoid phylogeny: systematics of *Psammodynastes* and *Bufo* (Elapoidea: Serpentes), with the description of a new Asian snake family

### Reference genomes

The reference genomes listed here were used to harvest ultraconserved elements (UCE) loci and traditional nuclear markers *in silico*.

#### *Bungarus multicinctus*

Genome assembly: ASM2365372v1,

[https://www.ncbi.nlm.nih.gov/datasets/genome/GCA\\_023653725.1/](https://www.ncbi.nlm.nih.gov/datasets/genome/GCA_023653725.1/)

Publication: Xu *et al.* Genomic, transcriptomic, and epigenomic analysis of a medicinal snake, *Bungarus multicinctus*, to provides insights into the origin of Elapidae neurotoxins. *Acta Pharm. Sin. B*, **13**, 2234–2249 (2023).

#### *Daboia siamensis*

Genome assembly: ASM2444931v1,

[https://www.ncbi.nlm.nih.gov/datasets/genome/GCA\\_024449315.1/](https://www.ncbi.nlm.nih.gov/datasets/genome/GCA_024449315.1/)

Publication: Saethang *et al.* Identification of *Daboia siamensis* venome using integrated multi-omics data. *Sci. Rep.*, **12**, 13140 (2022).

Remark: Only used for harvesting some traditional nuclear loci. UCes for *D. palaestinae* were already available from [7].

#### *Emydocephalus ijimae*

Genome assembly: emylji\_1.0,

[https://www.ncbi.nlm.nih.gov/datasets/genome/GCA\\_004319985.1/](https://www.ncbi.nlm.nih.gov/datasets/genome/GCA_004319985.1/)

Publication: Kishida *et al.* Loss of olfaction in sea snakes provides new perspectives on the aquatic adaptation of amniotes. *Proc. R. Soc. B*, **286**, 20191828 (2019).

*Hydrophis cyanocinctus*

Genome assembly: HCya\_v2,

[https://www.ncbi.nlm.nih.gov/datasets/genome/GCA\\_019473425.1/](https://www.ncbi.nlm.nih.gov/datasets/genome/GCA_019473425.1/)

Publication: Li *et al.* Two Reference-Quality Sea Snake Genomes Reveal Their Divergent Evolution of Adaptive Traits and Venom Systems. *Mol. Biol. Evol.*, **38**, 4867–4883 (2021).

*Hydrophis curtus*

Genome assembly: HCur\_v2,

[https://www.ncbi.nlm.nih.gov/datasets/genome/GCA\\_019472885.1/](https://www.ncbi.nlm.nih.gov/datasets/genome/GCA_019472885.1/)

Publication: Li *et al.* Two Reference-Quality Sea Snake Genomes Reveal Their Divergent Evolution of Adaptive Traits and Venom Systems. *Mol. Biol. Evol.*, **38**, 4867–4883 (2021).

*Hydrophis melanocephalus*

Genome assembly: hydMel\_1.0,

[https://www.ncbi.nlm.nih.gov/datasets/genome/GCA\\_004320005.1/](https://www.ncbi.nlm.nih.gov/datasets/genome/GCA_004320005.1/)

Publication: Kishida *et al.* Loss of olfaction in sea snakes provides new perspectives on the aquatic adaptation of amniotes. *Proc. R. Soc. B*, **286**, 20191828 (2019).

*Laticauda colubrina*

Genome assembly: latCor\_2.0,

[https://www.ncbi.nlm.nih.gov/datasets/genome/GCA\\_015471245.1/](https://www.ncbi.nlm.nih.gov/datasets/genome/GCA_015471245.1/)

Publication: Kishida *et al.* Loss of olfaction in sea snakes provides new perspectives on the aquatic adaptation of amniotes. *Proc. R. Soc. B*, **286**, 20191828 (2019).

*Laticauda laticaudata*

Genome assembly: latLat\_1.0,

[https://www.ncbi.nlm.nih.gov/datasets/genome/GCA\\_004320025.1/](https://www.ncbi.nlm.nih.gov/datasets/genome/GCA_004320025.1/)

Publication: Kishida *et al.* Loss of olfaction in sea snakes provides new perspectives on the aquatic adaptation of amniotes. *Proc. R. Soc. B*, **286**, 20191828 (2019).

*Myanophis thanlyinensis*

Genome assembly: ASM1765603v1,

[https://www.ncbi.nlm.nih.gov/datasets/genome/GCA\\_017656035.1/](https://www.ncbi.nlm.nih.gov/datasets/genome/GCA_017656035.1/)

Publication: Köhler *et al.* A new genus and species of mud snake from Myanmar (Reptilia, Squamata, Homalopsidae). *Zootaxa*, **4915**, 301–325(2021).

*Naja naja*

Genome assembly: Nana\_v5,

[https://www.ncbi.nlm.nih.gov/datasets/genome/GCA\\_009733165.1/](https://www.ncbi.nlm.nih.gov/datasets/genome/GCA_009733165.1/)

Publication: Suryamohan *et al.* The Indian cobra reference genome and transcriptome enables comprehensive identification of venom toxins. *Nat. Genetics*, **52**, pages106–117 (2020).

*Notechis scutatus*

Genome assembly: TS10Xv2-PRI,

[https://www.ncbi.nlm.nih.gov/datasets/genome/GCF\\_900518725.1/](https://www.ncbi.nlm.nih.gov/datasets/genome/GCF_900518725.1/)

Publication: No specific publication (but the genome assembly has been used and cited by subsequent researches).

*Ophiophagus hannah*

Genome assembly: OphHan1.0,

[https://www.ncbi.nlm.nih.gov/datasets/genome/GCA\\_000516915.1/](https://www.ncbi.nlm.nih.gov/datasets/genome/GCA_000516915.1/)

Publication: Vonk *et al.* The king cobra genome reveals dynamic gene evolution and adaptation in the snake venom system. *Proc. Natl. Acad. Sci.*, **10**, 20651–20656 (2013).

*Psammodynastes pulverulentus*

Genome assembly: ASM2580229v1,

[https://www.ncbi.nlm.nih.gov/datasets/genome/GCA\\_025802295.1/](https://www.ncbi.nlm.nih.gov/datasets/genome/GCA_025802295.1/)

Publication: This paper.

## Supplementary figures

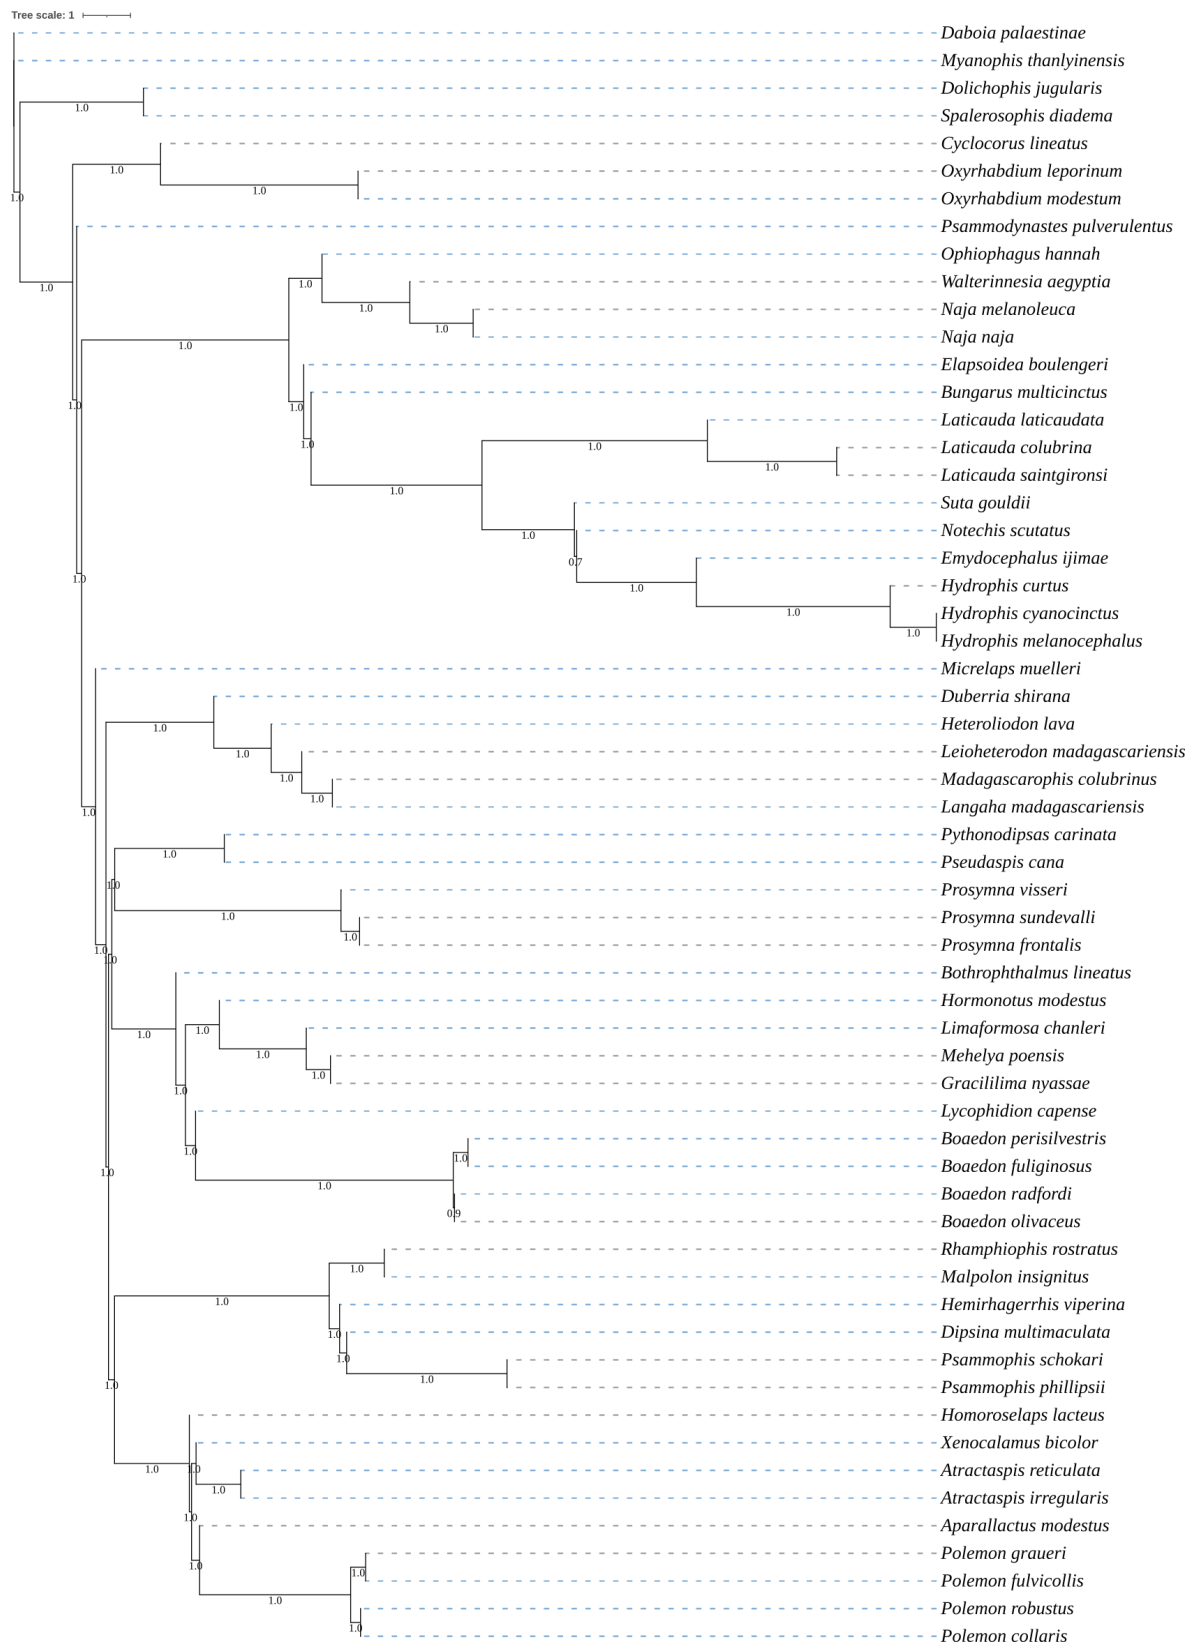

Fig. S1: 50 % complete UCE wASTRAL-h phylogeny. LocalPP on the branches.

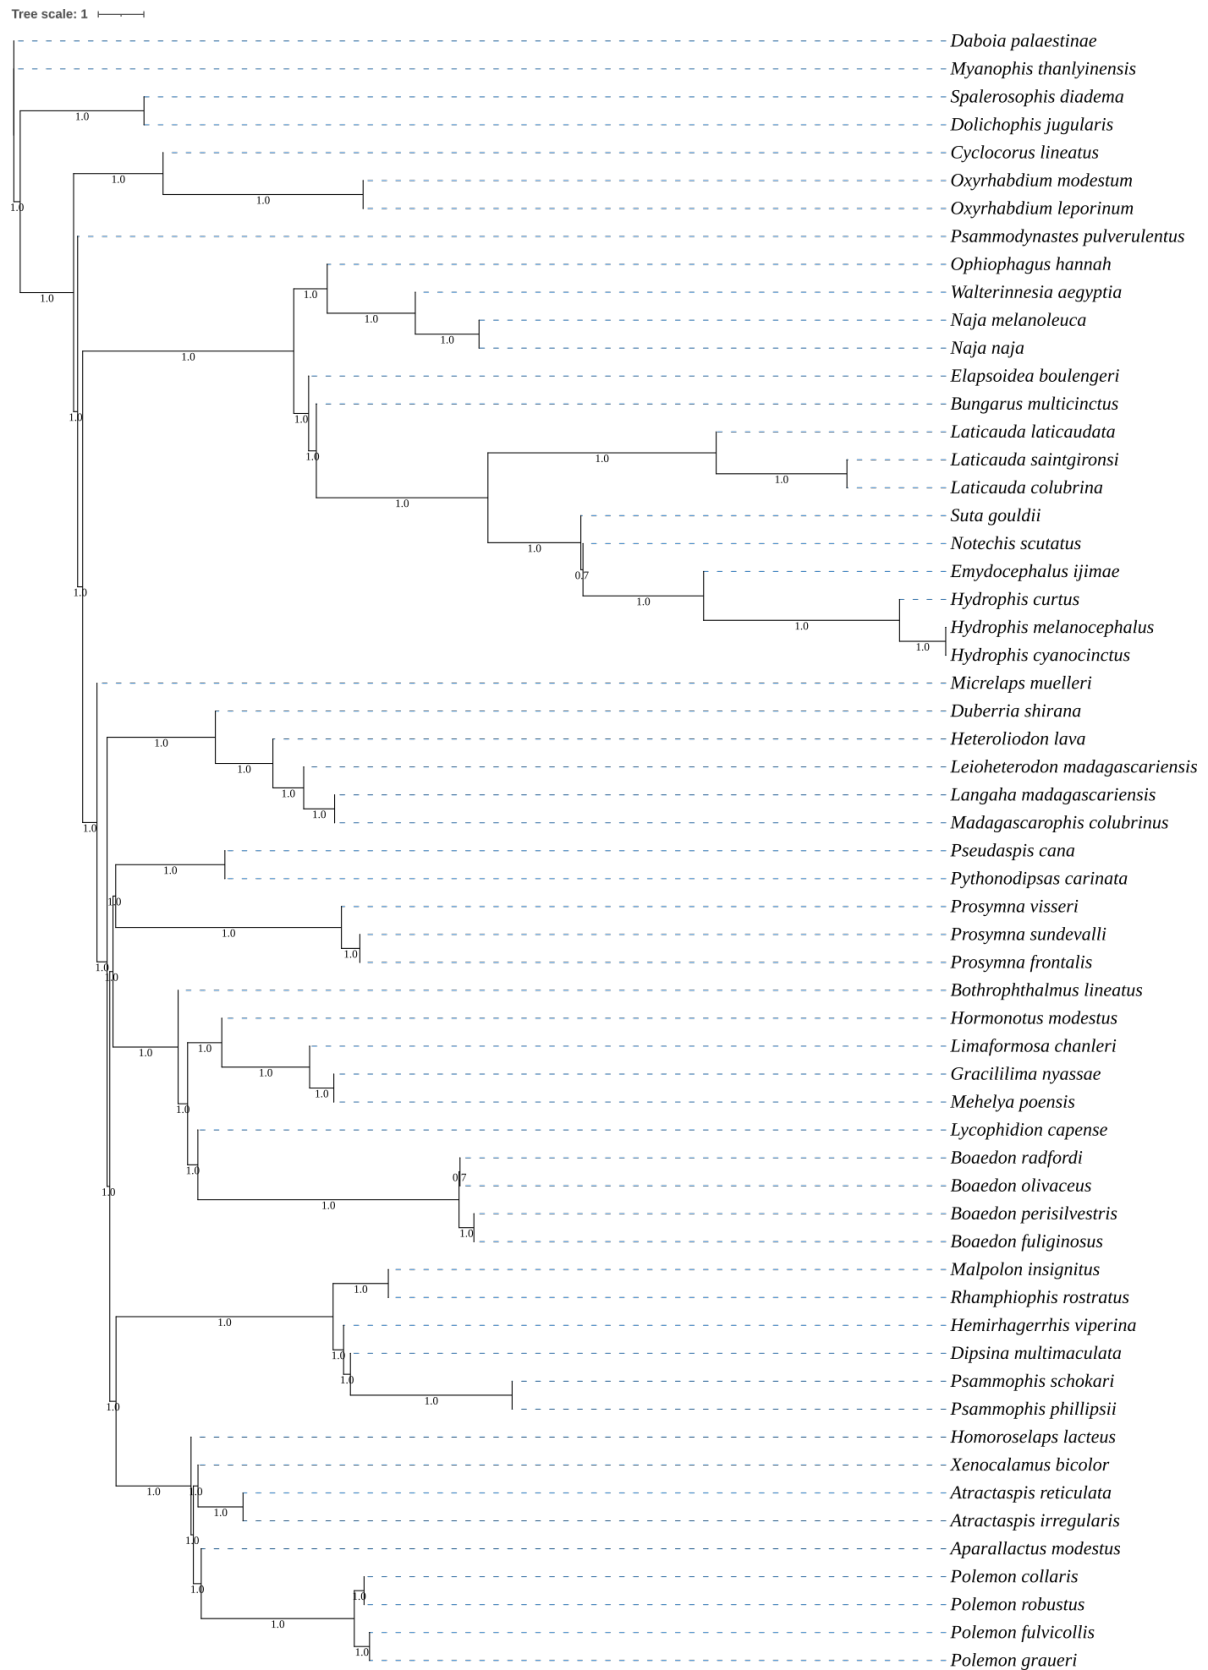

Fig. S2: 75 % complete UCE wASTRAL-h phylogeny. LocalPP on the branches.

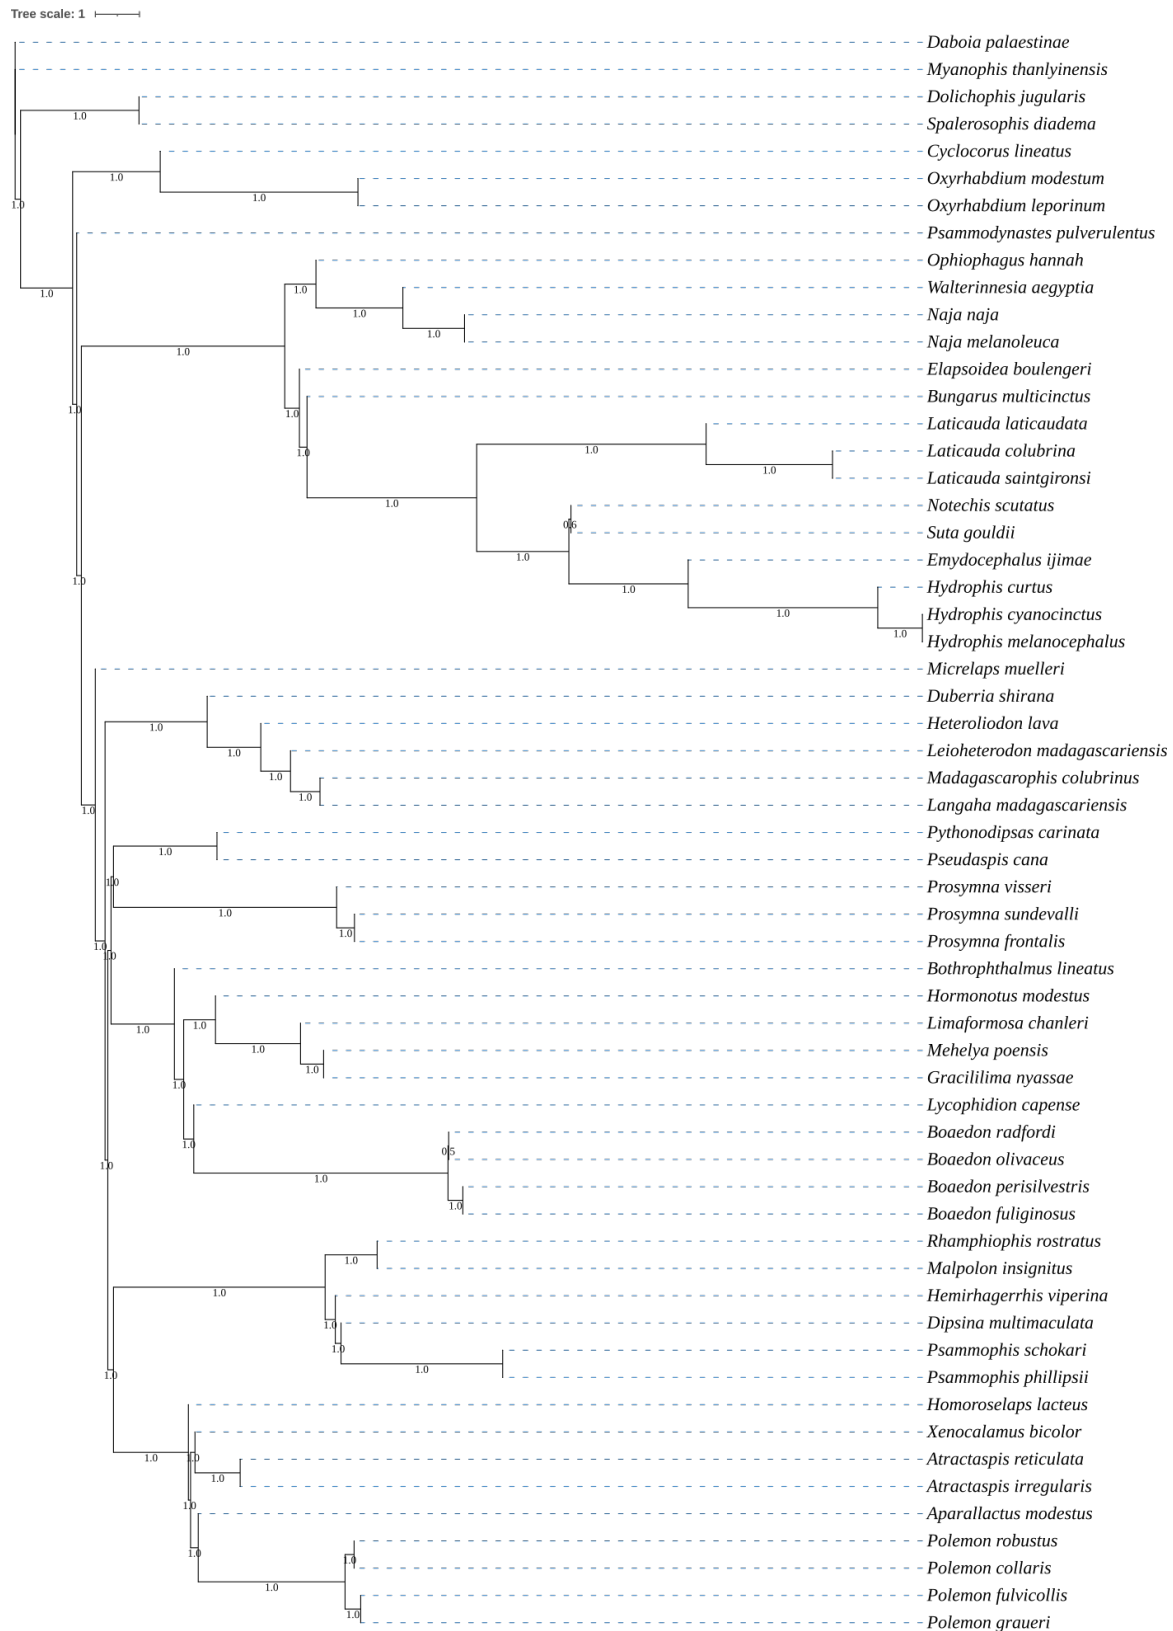

Fig. S3: 95 % complete UCE wASTRAL-h phylogeny. LocalPP on the branches.

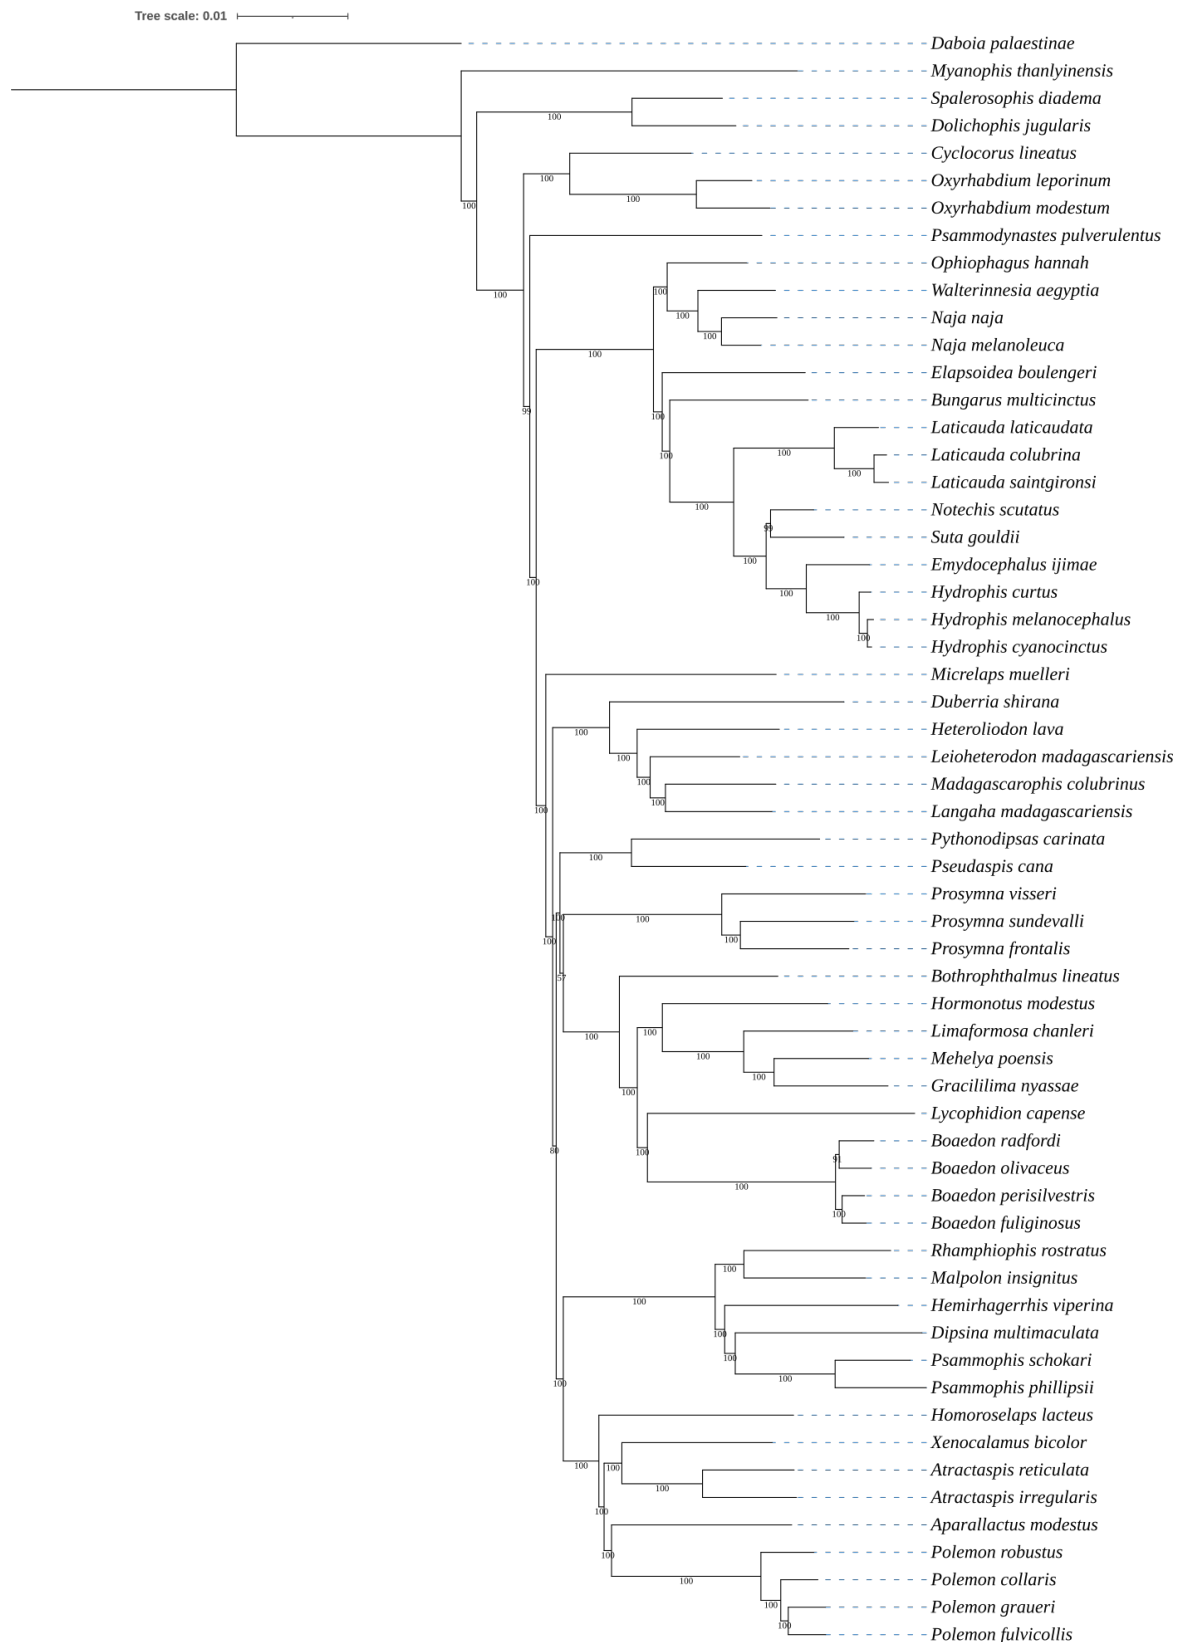

Fig. S4: 50 % complete UCE ML phylogeny. UFBoot on the branches.



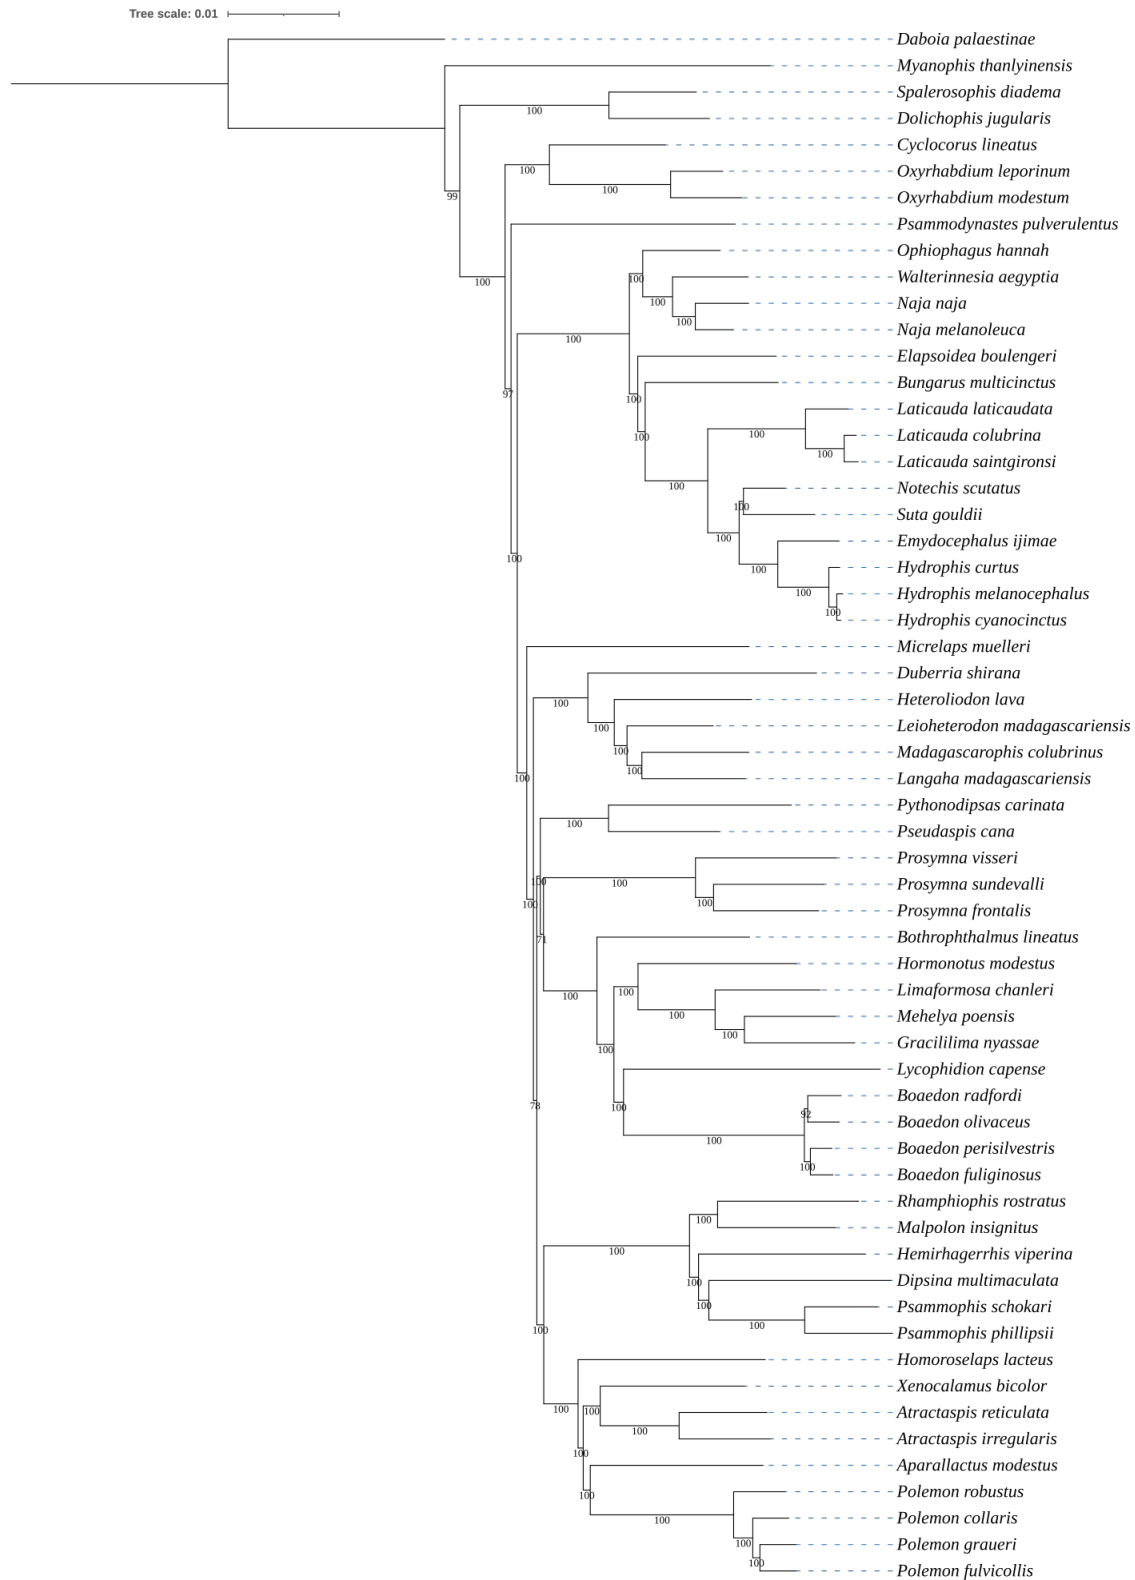

Fig. S5: 75 % complete UCE ML phylogeny. UFBoot on the branches.

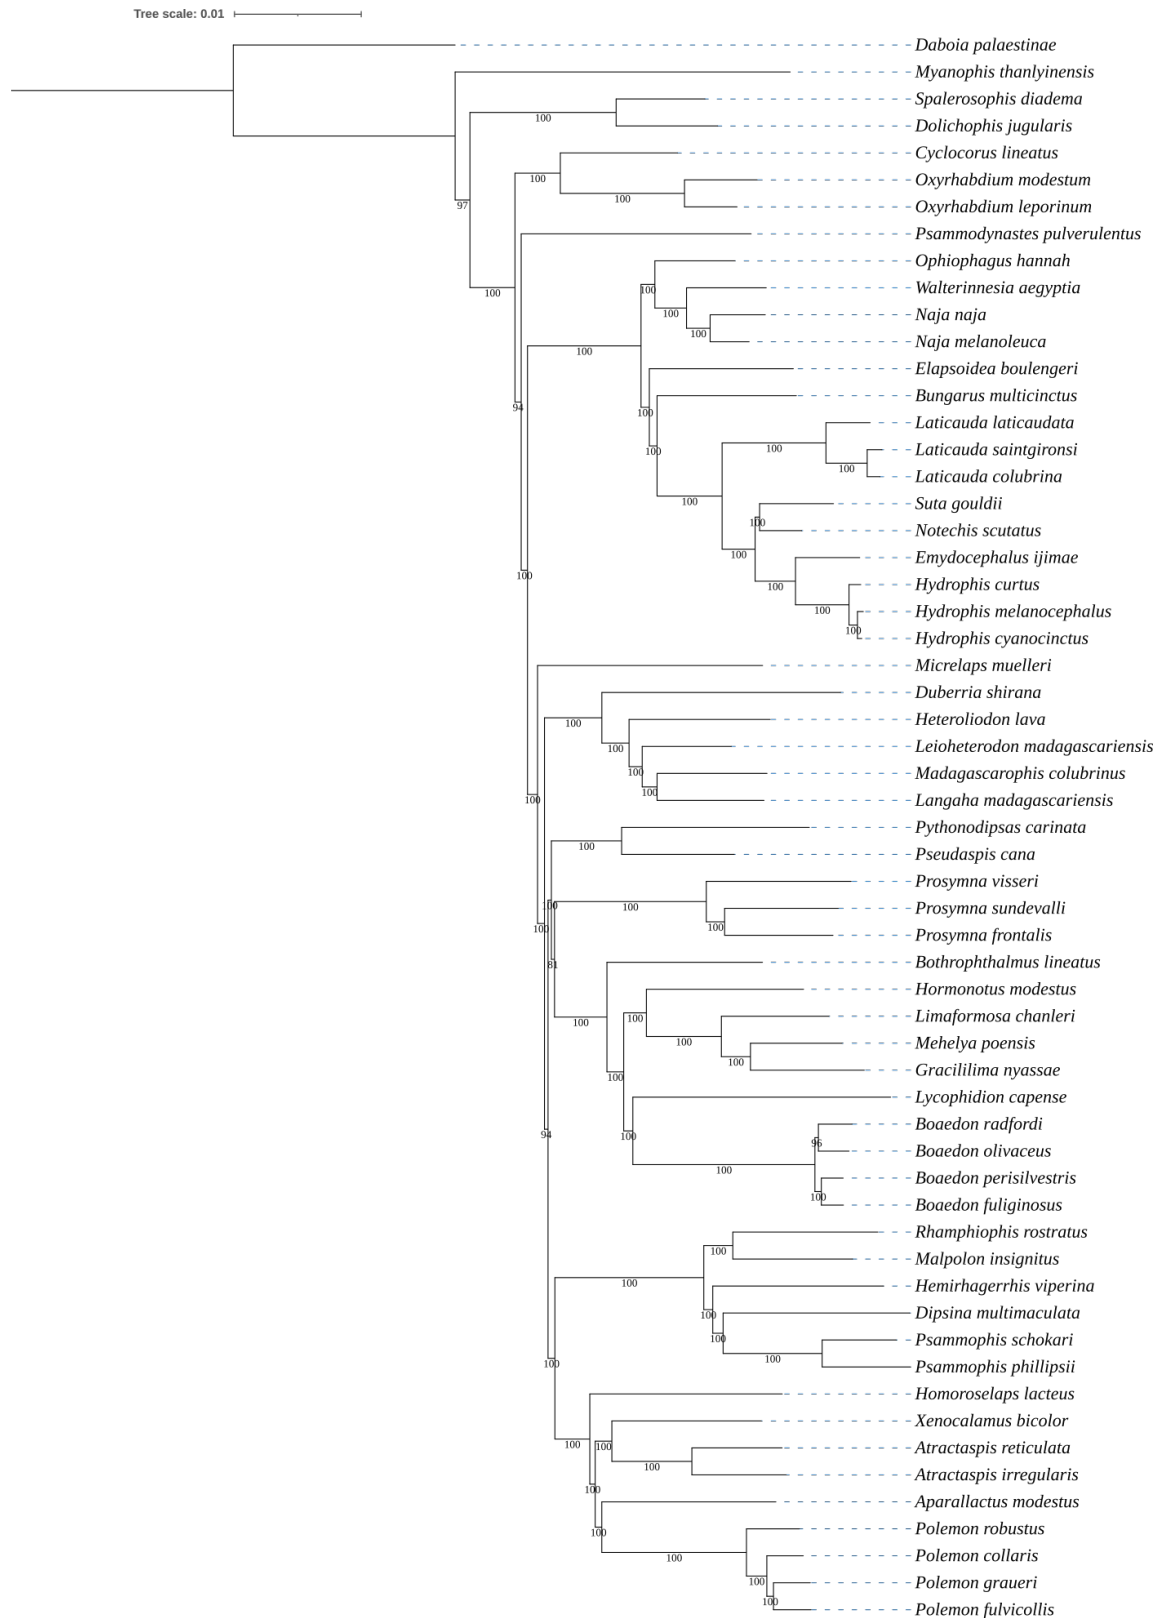

Fig. S6: 95 % complete UCE ML phylogeny. UFBoot on the branches.

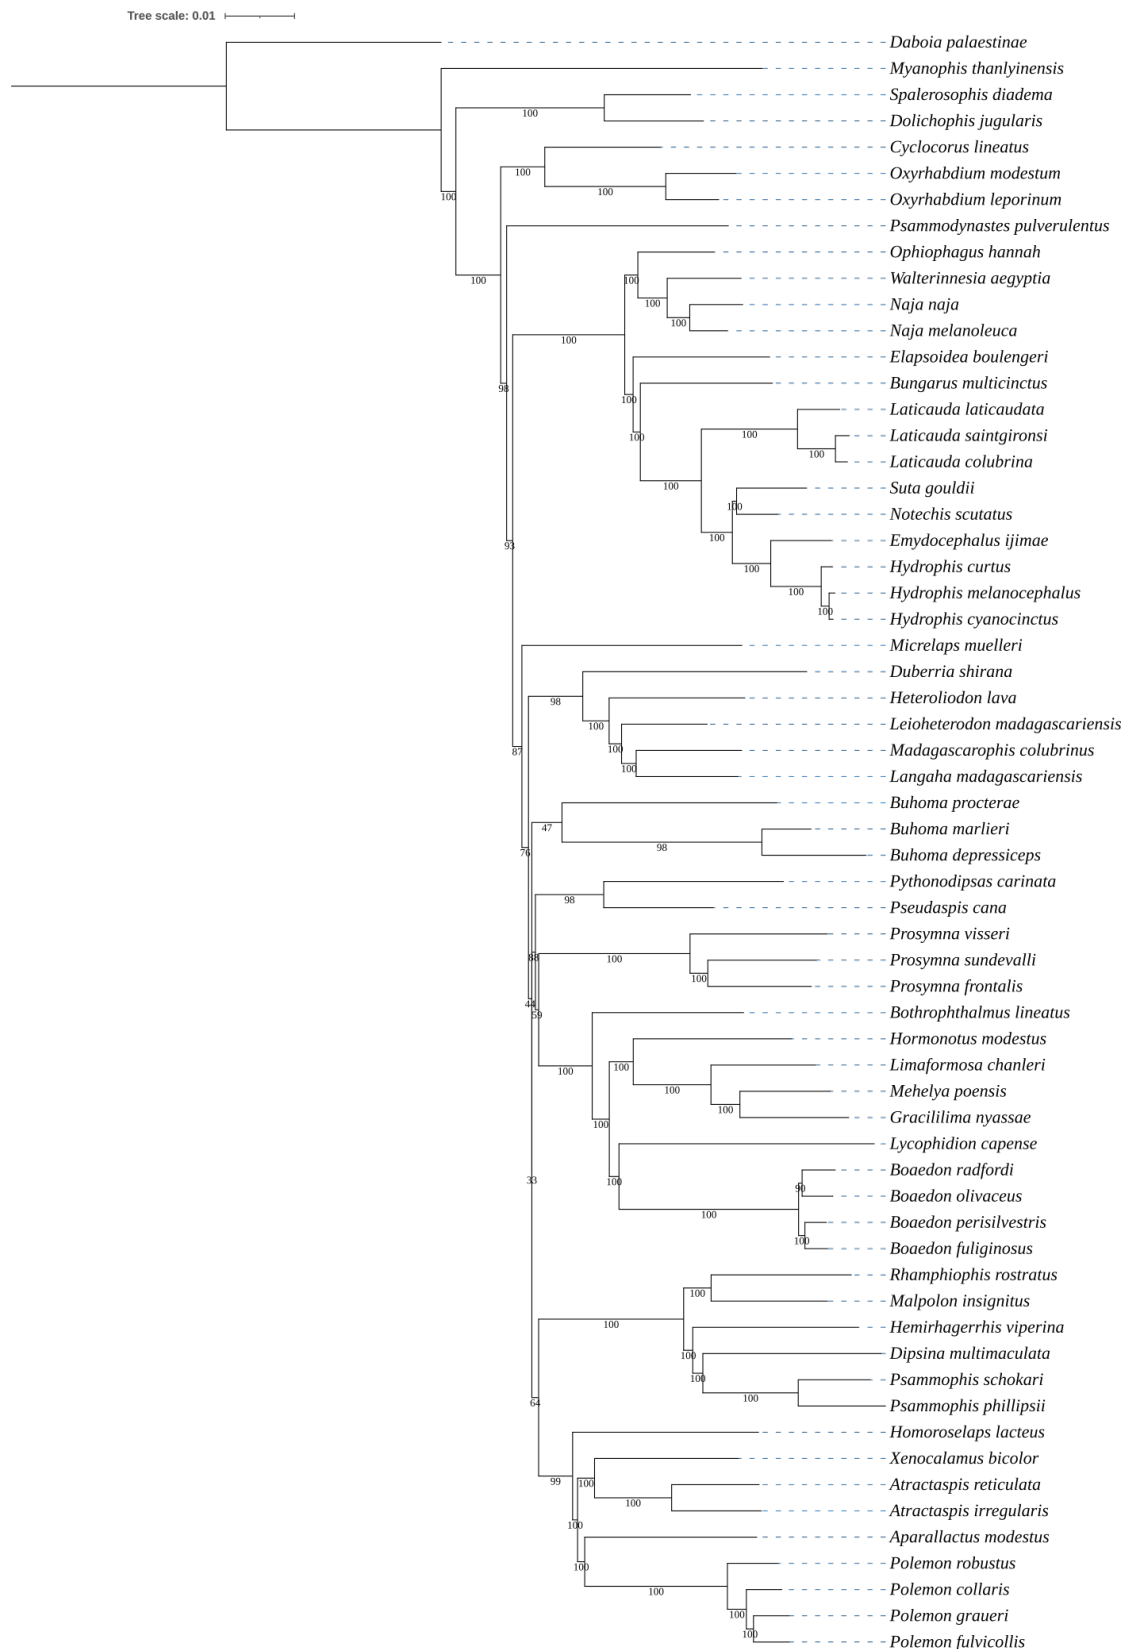

Fig. S7: 50 % UCE + tradition nuclear marker ML phylogeny. UFBoot on branches. For composite taxa (named here as in UCE dataset), see Figure 2 and Table S1.

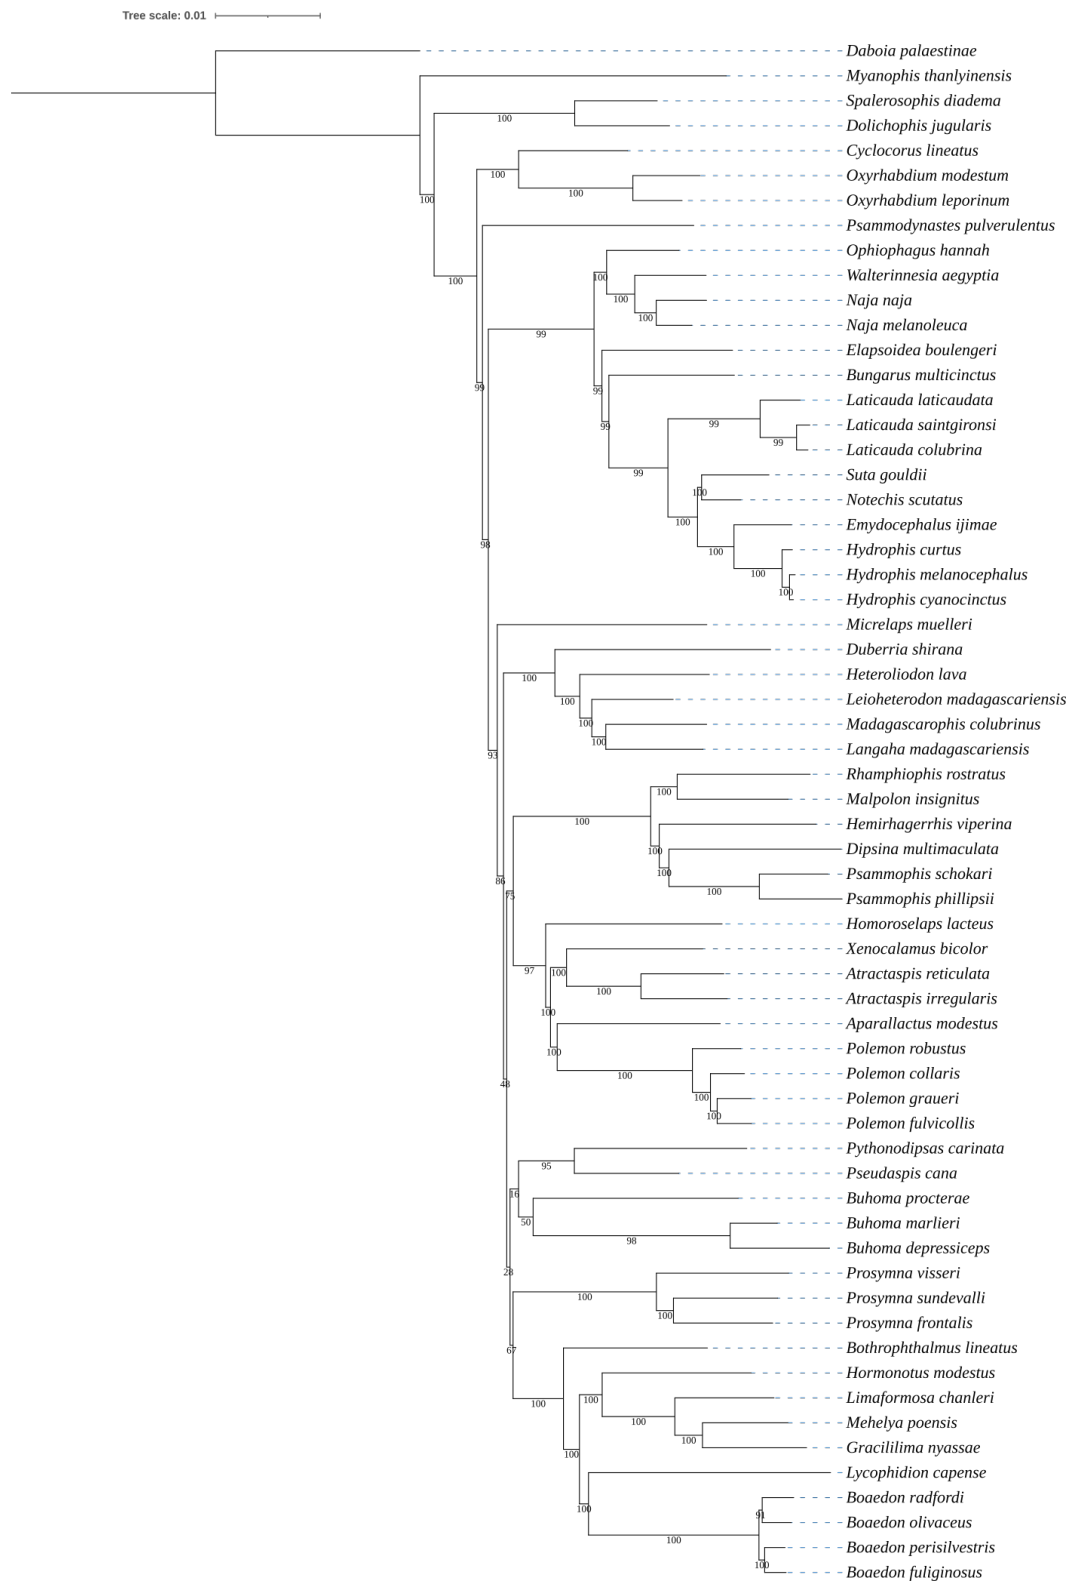

Fig. S8: 75 % UCE + tradition nuclear marker ML phylogeny. UFBoot on branches. For composite taxa (named here as in UCE dataset), see Figure 2 and Table S1.

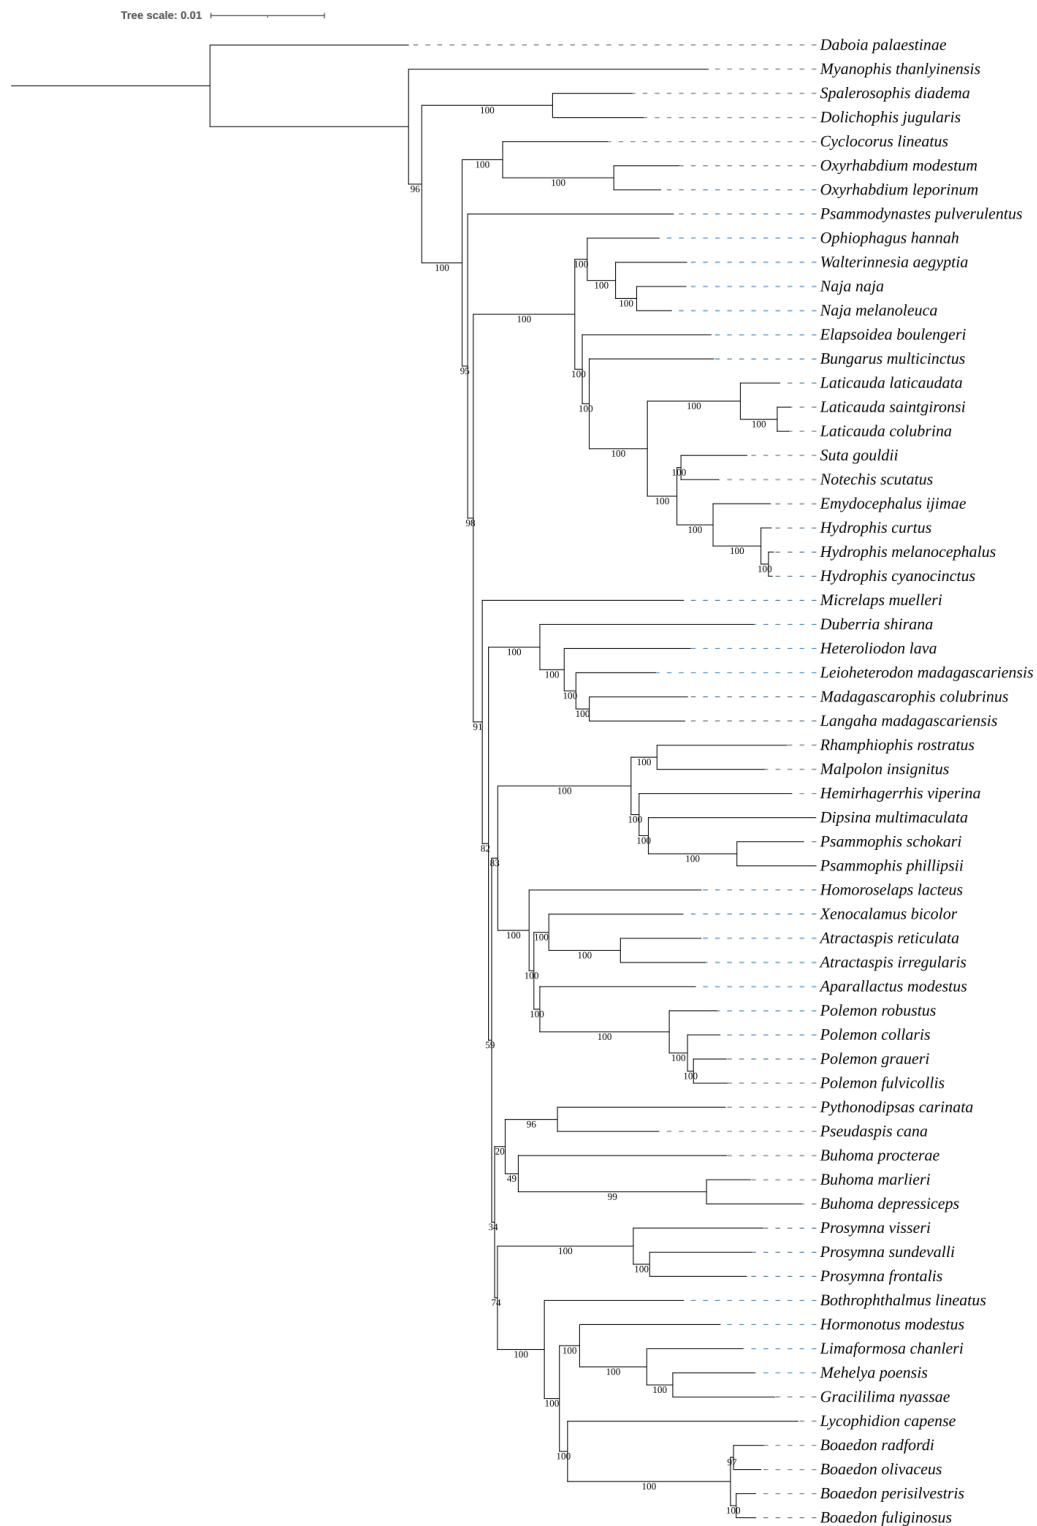

Fig. S9: 95 % UCE + tradition nuclear marker ML phylogeny. UFBoot on branches. For composite taxa (named here as in UCE dataset), see Figure 2 and Table S1.

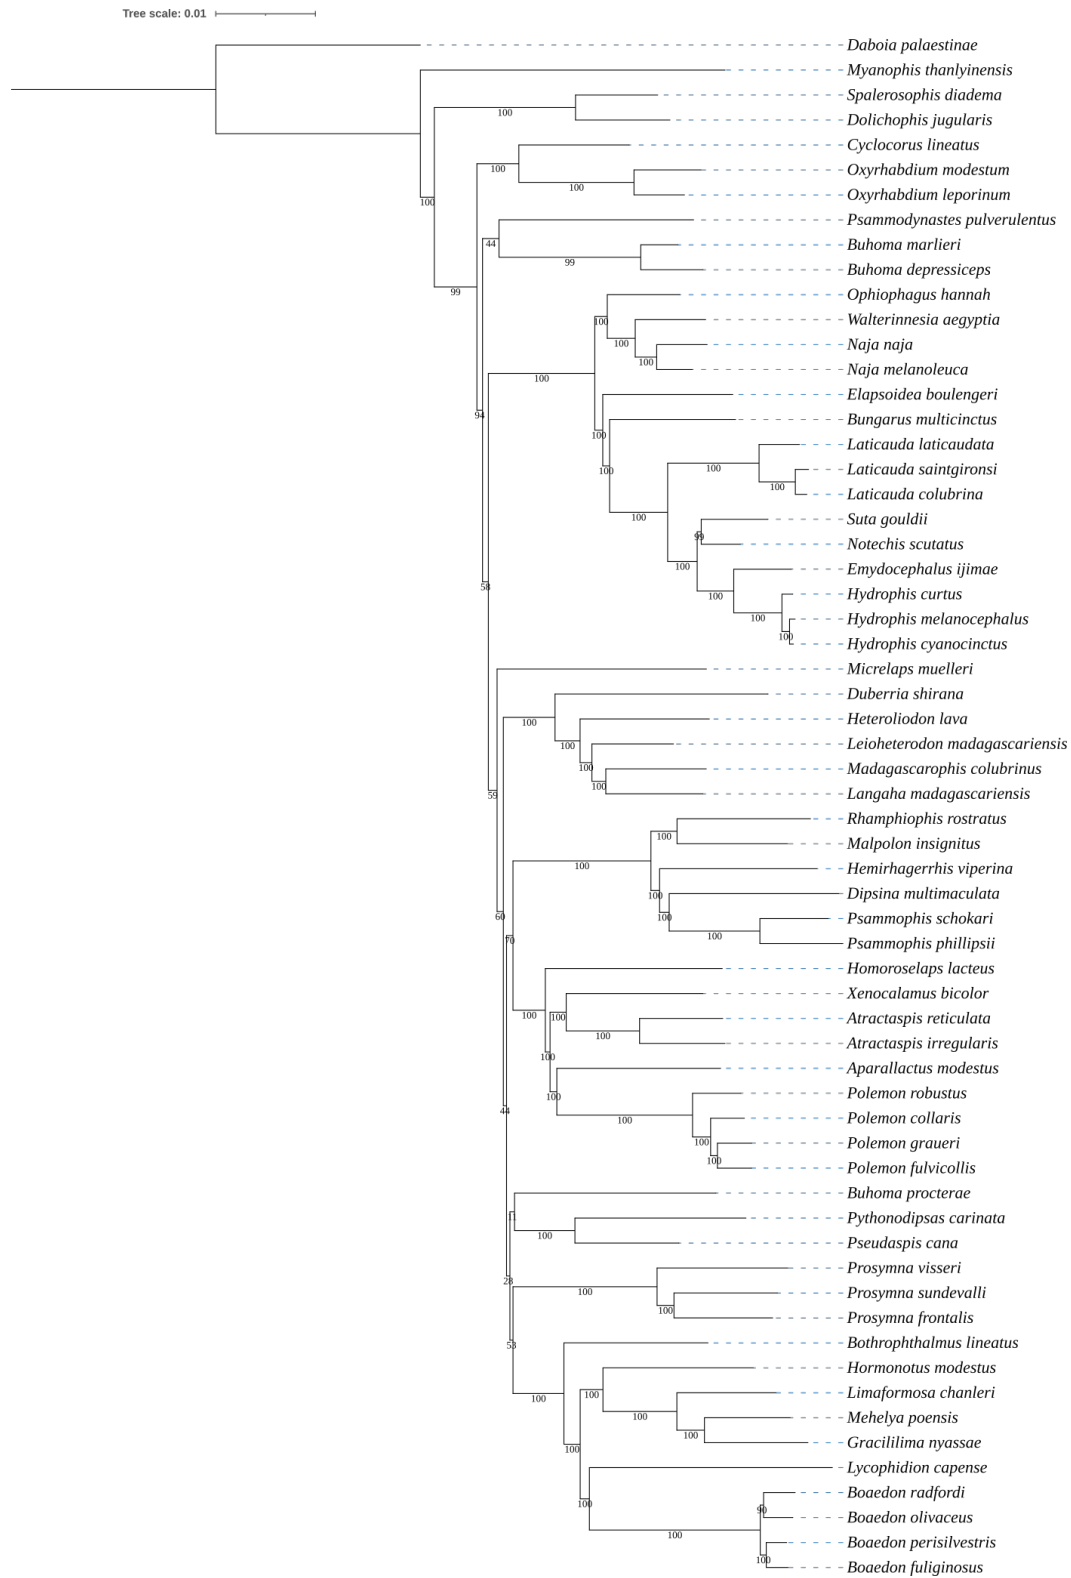

Fig. S10: 50 % UCE + tradition mito-nuclear marker ML phylogeny. UFBoot on branches.

For composite taxa (named here as in UCE dataset), see Table S1.

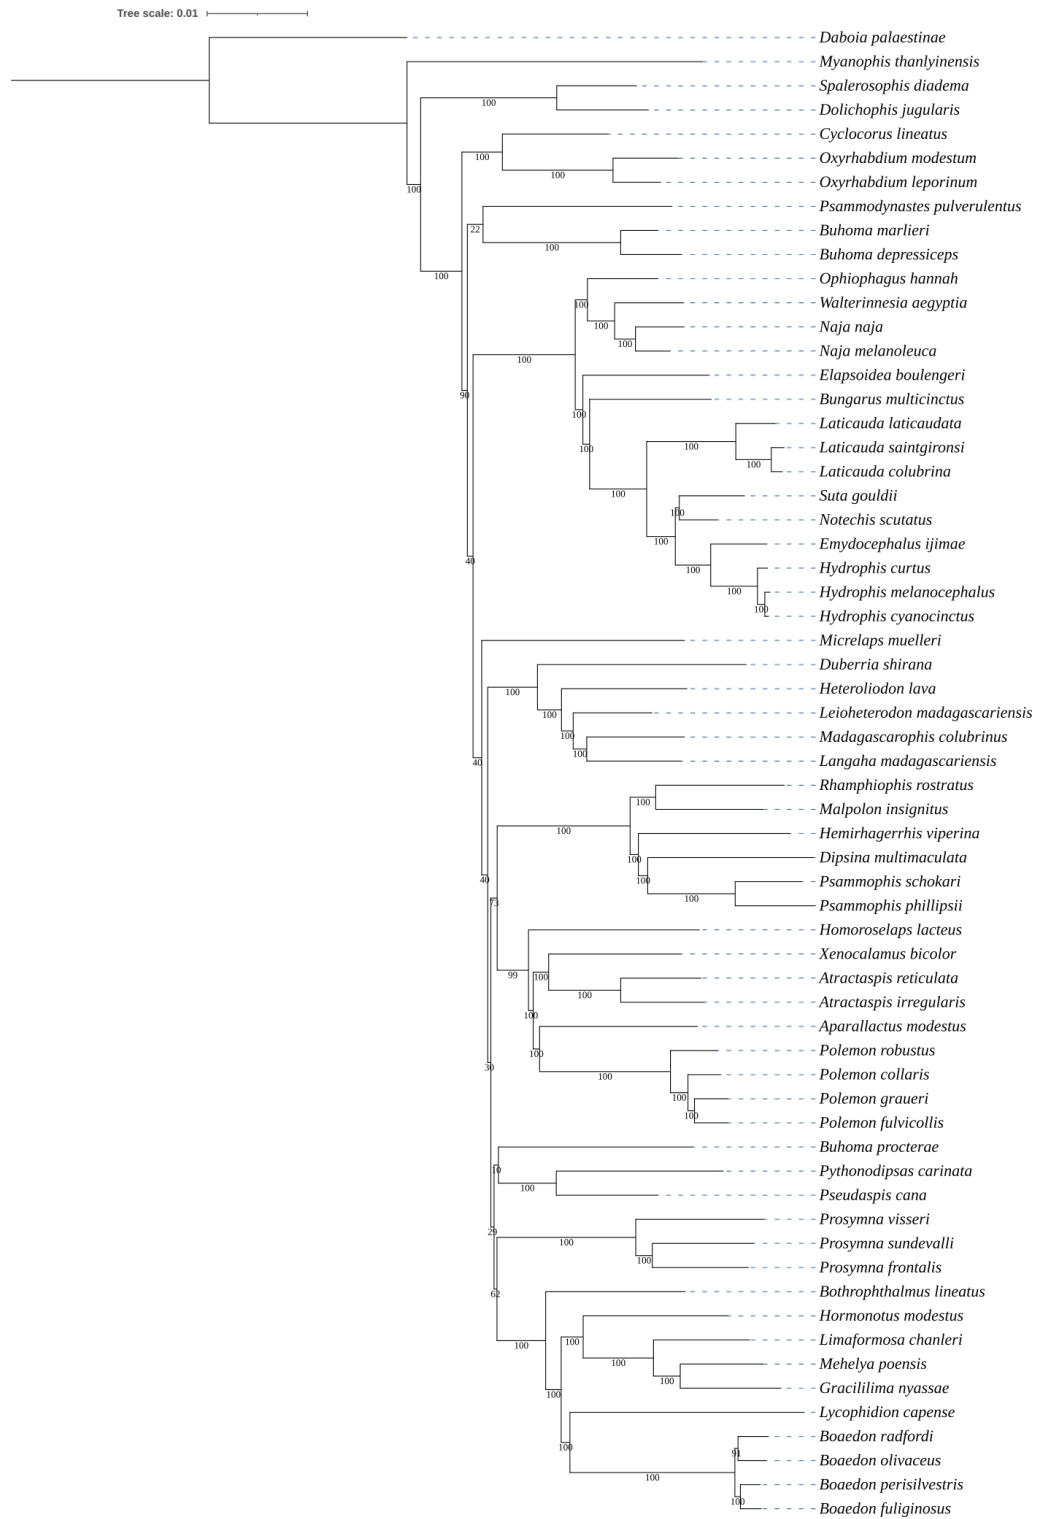

Fig. S11: 75 % UCE + tradition mito-nuclear marker ML phylogeny. UFBoot on branches.

For composite taxa (named here as in UCE dataset), see Table S1.

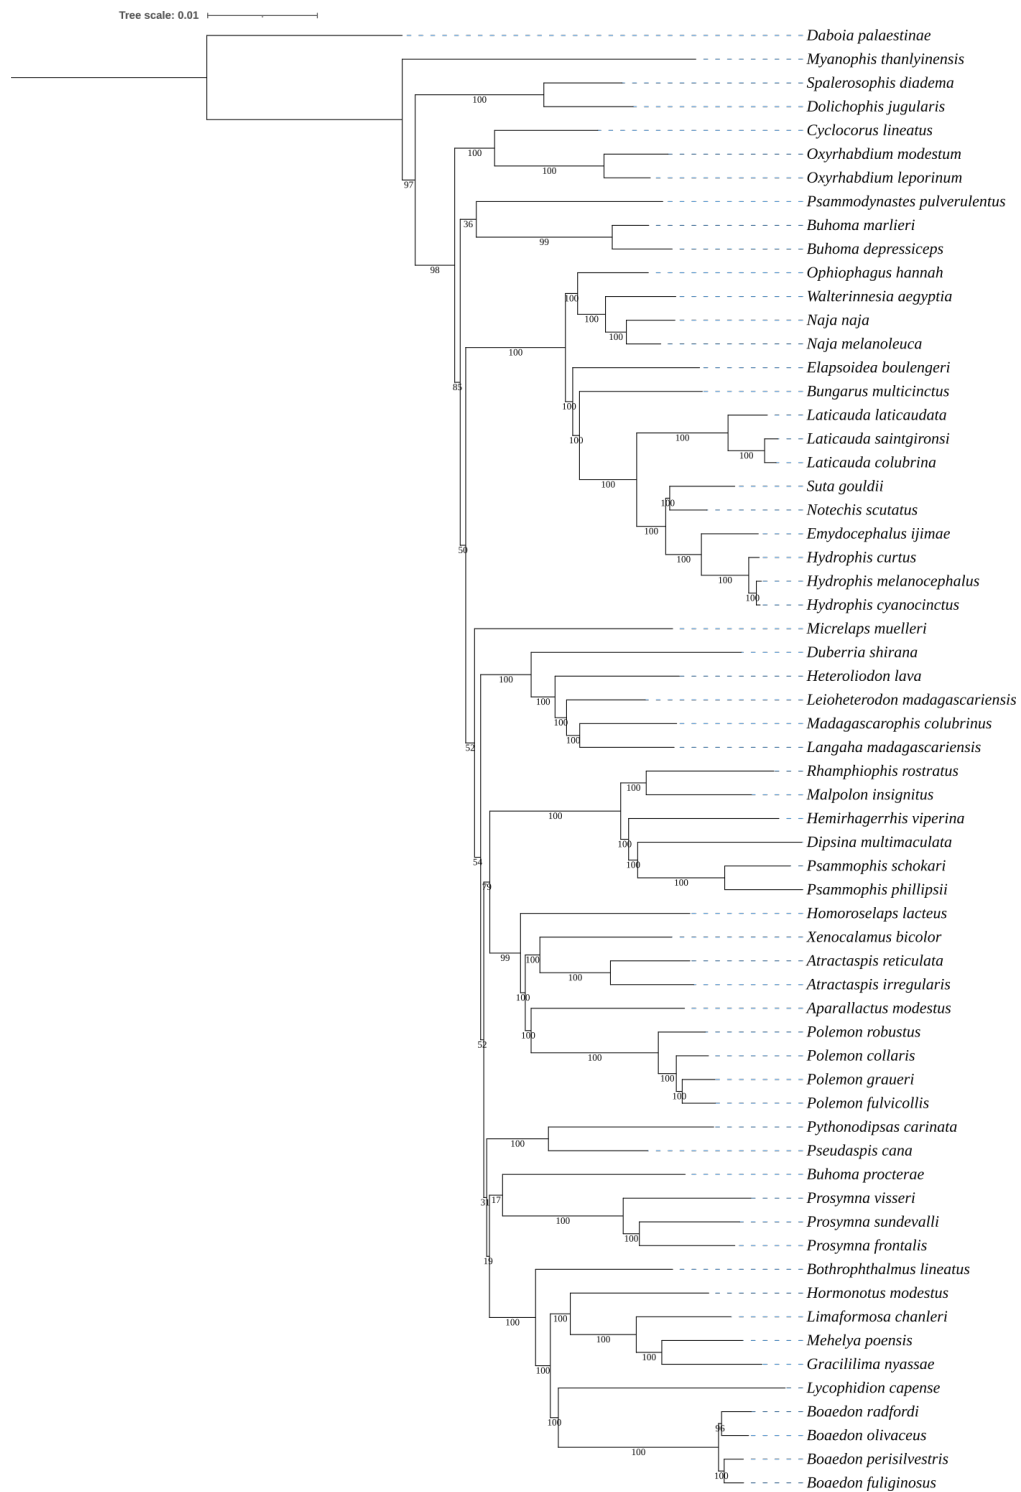

Fig. S12: 95 % UCE + tradition mito-nuclear marker ML phylogeny. UFBoot on branches.

For composite taxa (named here as in UCE dataset), see Table S1.



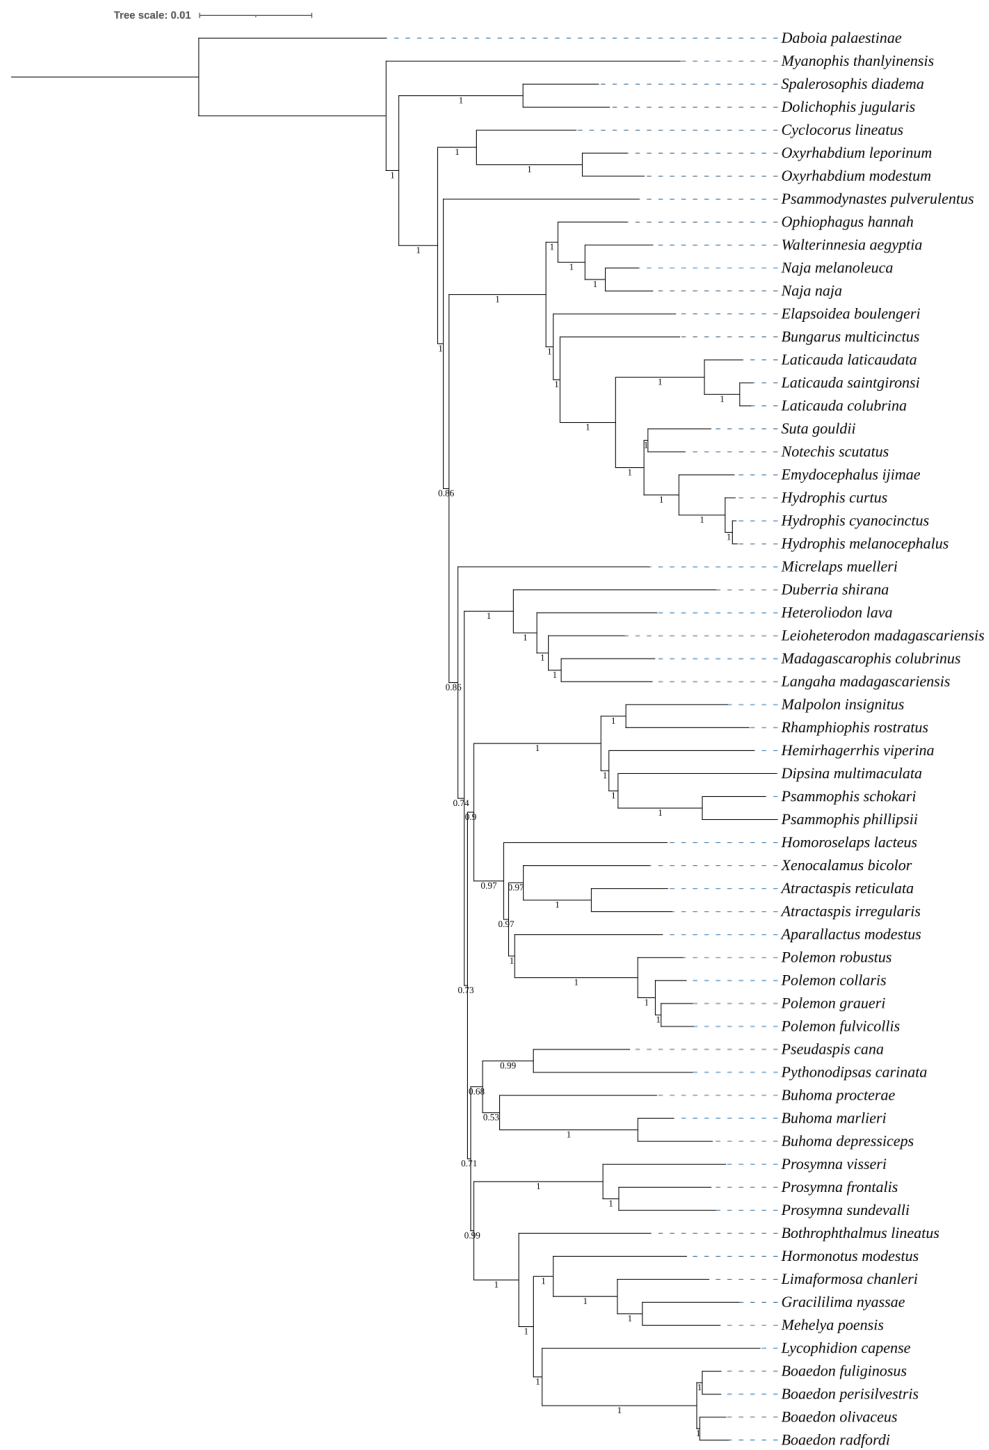

Fig. S13: 95 % UCE and traditional nuclear marker ExaBayes phylogeny. Posterior probability on the branches. For composite taxa (named here as in UCE dataset), see Figure 2 and Table S1.

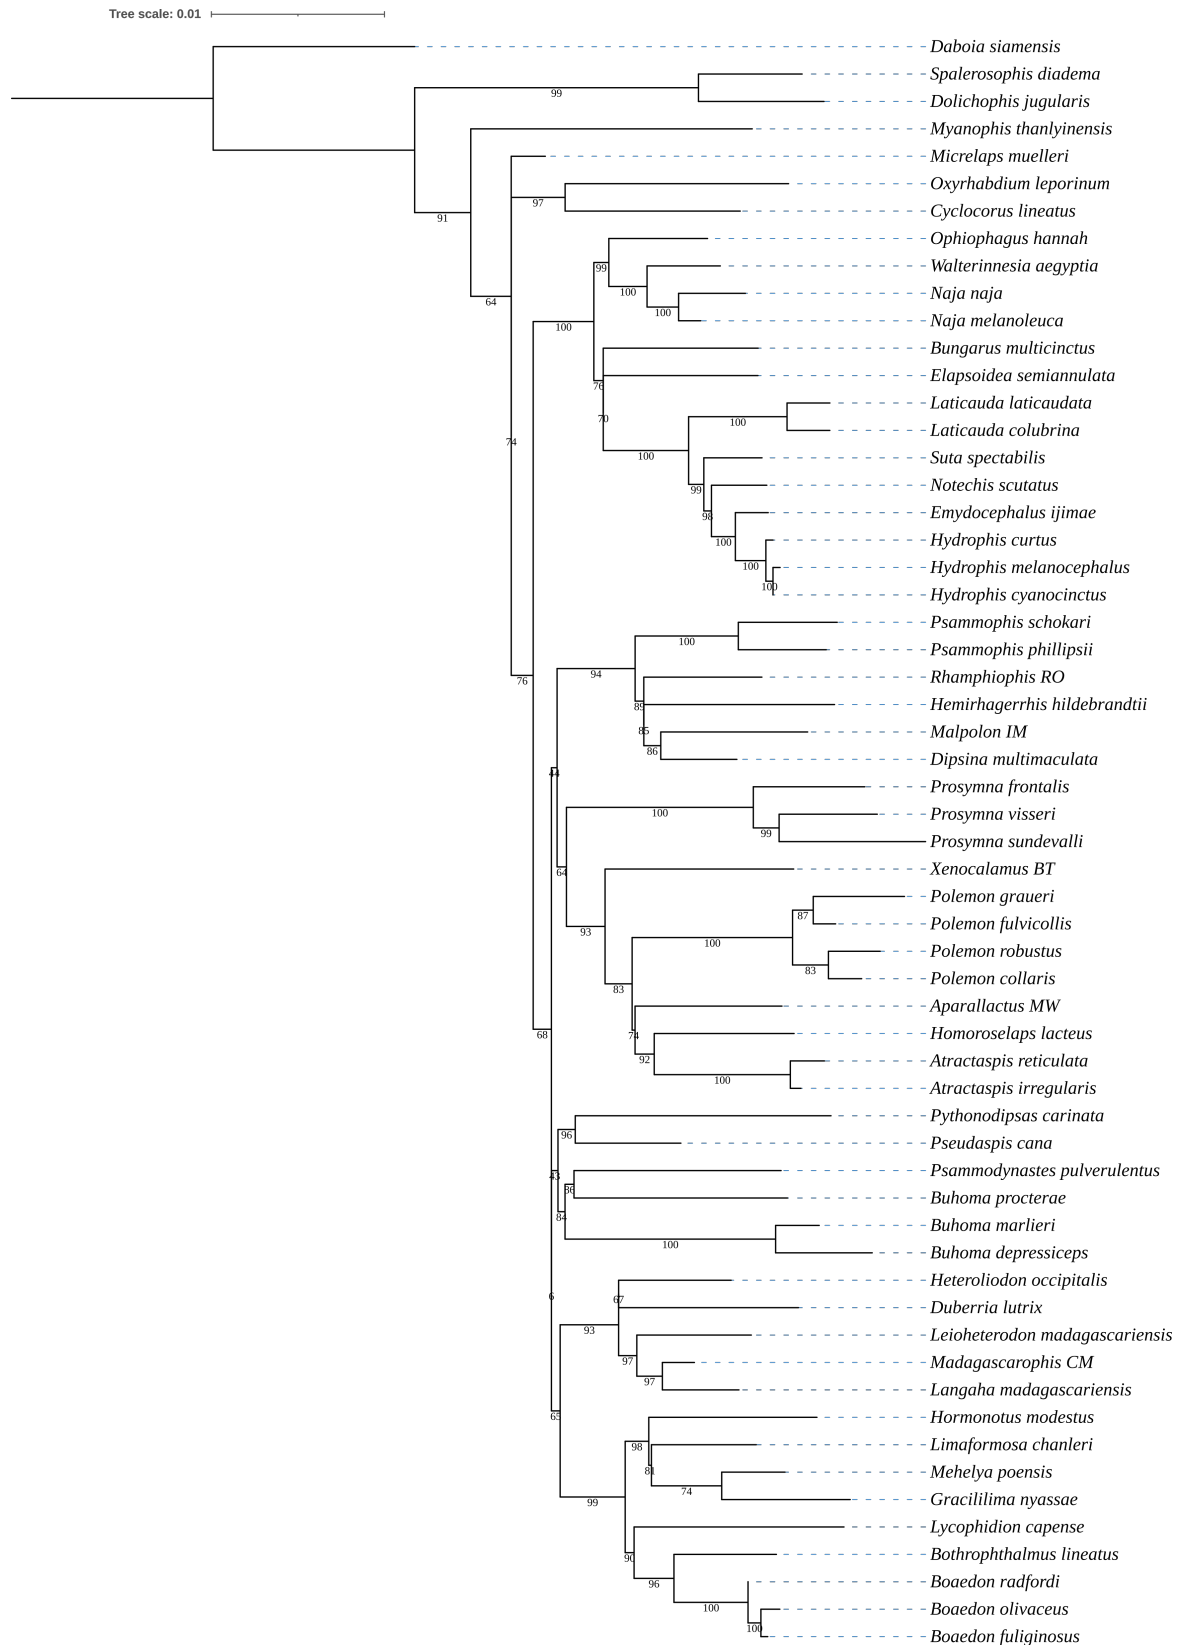

Fig. S14: Traditional nuclear marker ML phylogeny. UFBoot on the branches. For composite taxa, see Table S1.

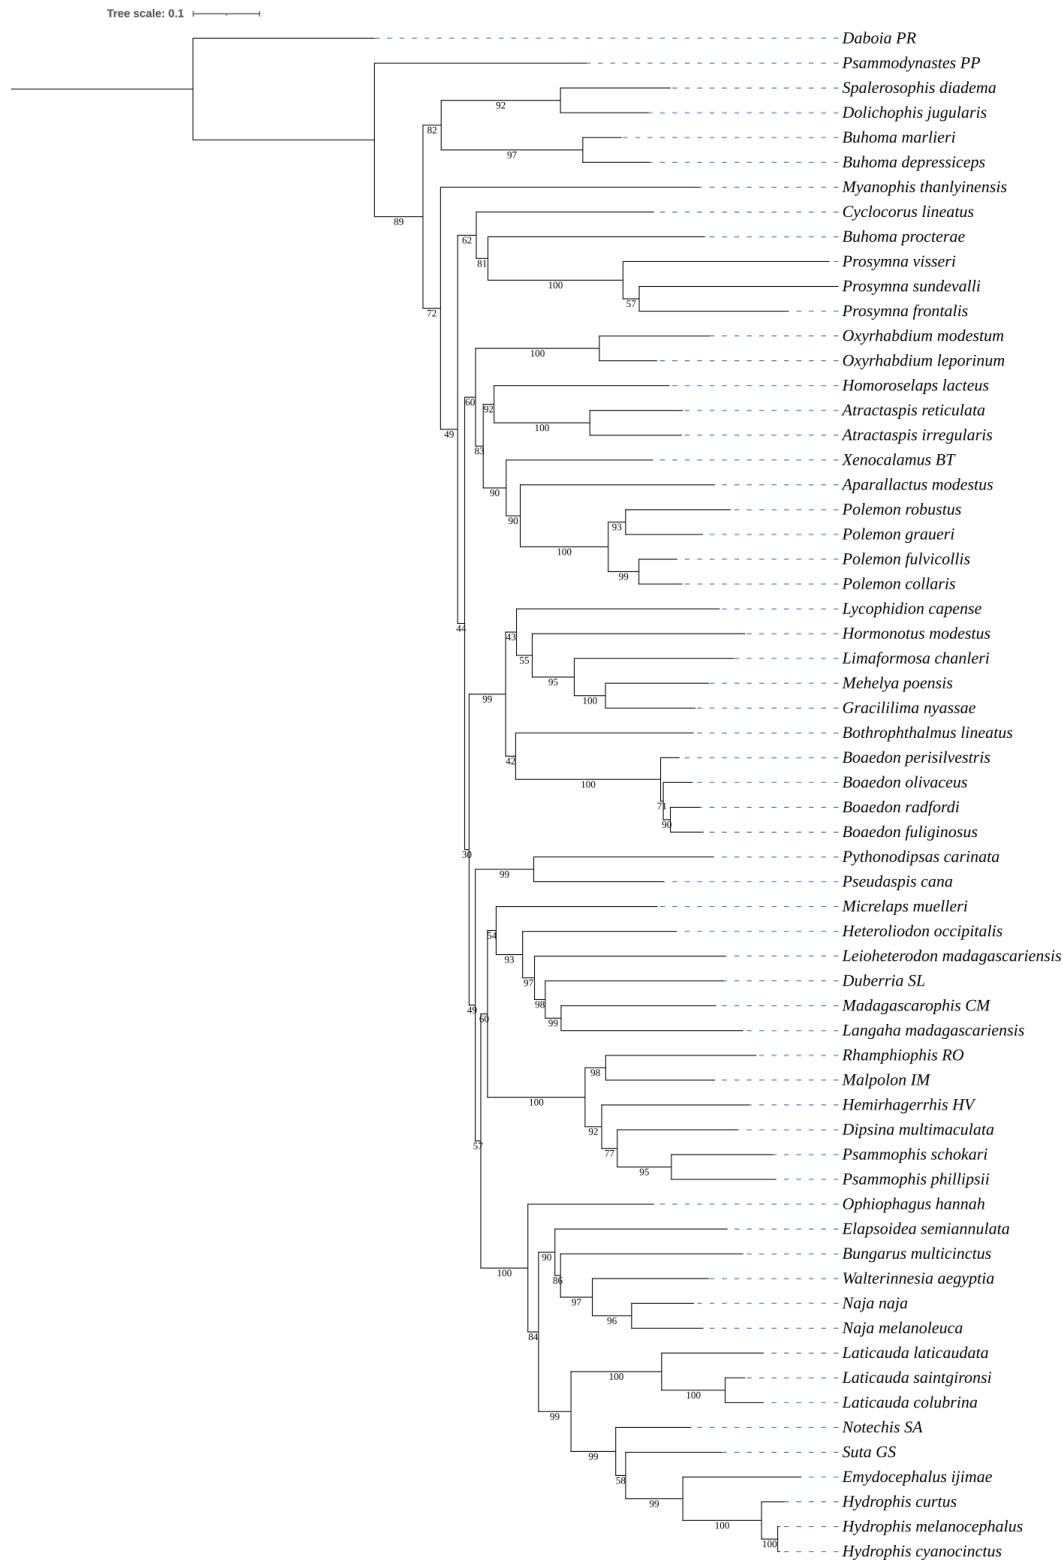

Fig. S15: Traditional mitochondrial marker ML phylogeny. UFBboot on the branches. For composite taxa (the ones with capital letters in the place of the specific epithet), see Table S1.

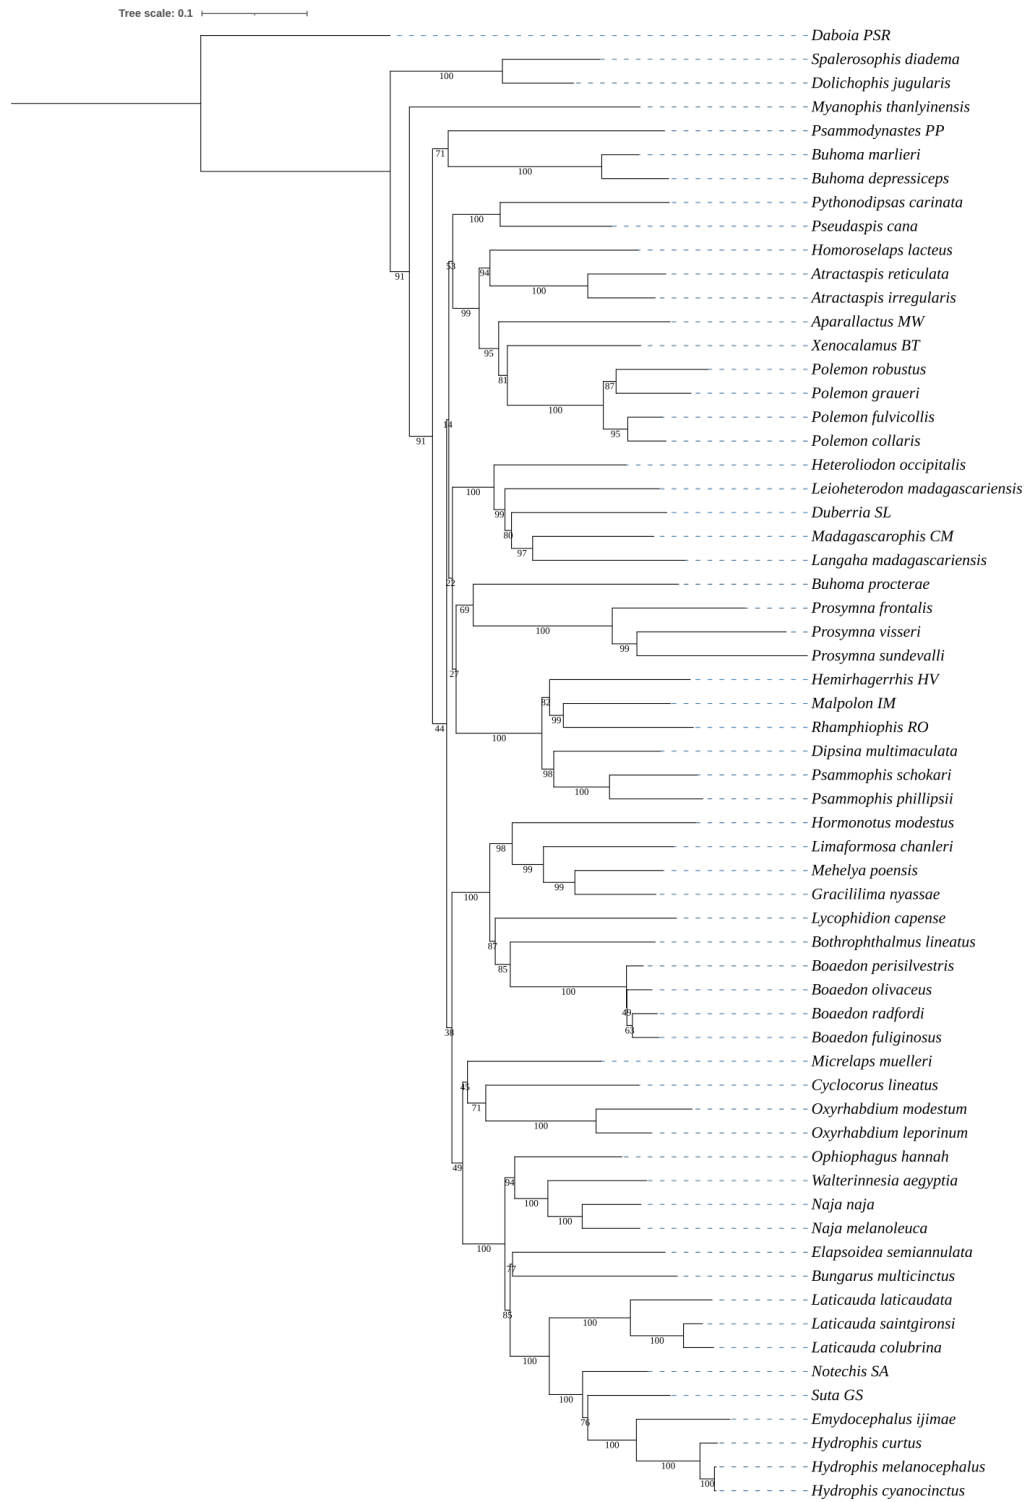

Fig. S16: Traditional mito-nuclear marker ML phylogeny. UFBoot on the branches. For composite taxa (the ones with capital letters in the place of the specific epithet), see Table S1.

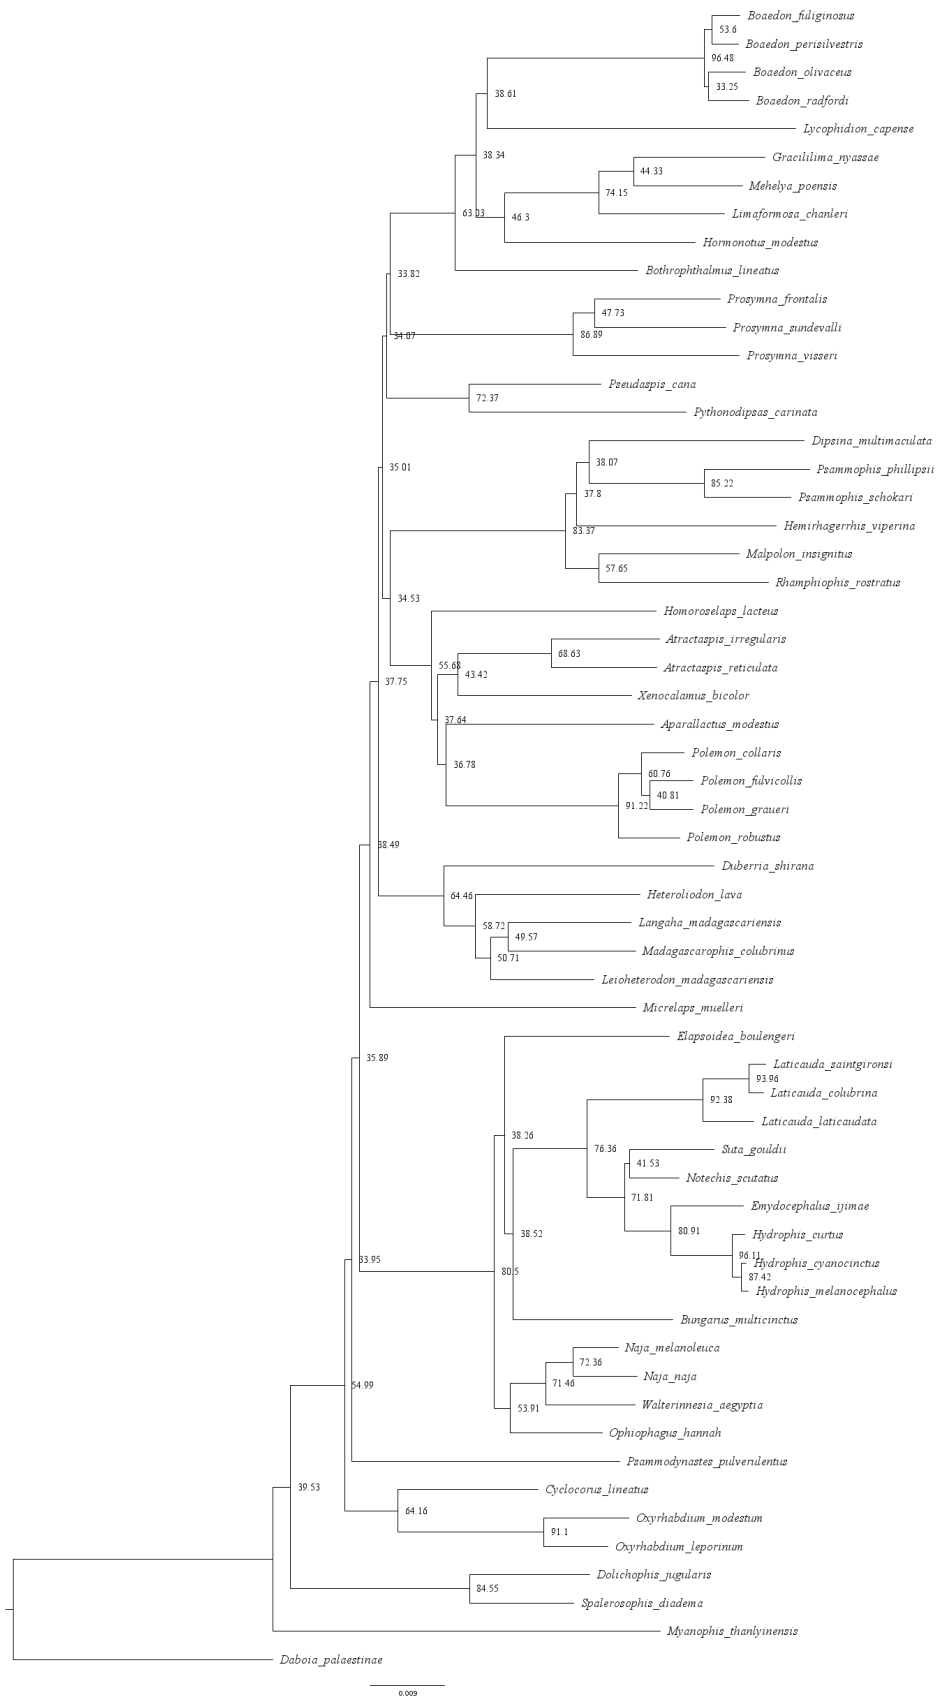

Fig. S17: Site concordance factors received by the branches in the 50 % complete UCE ML phylogeny.

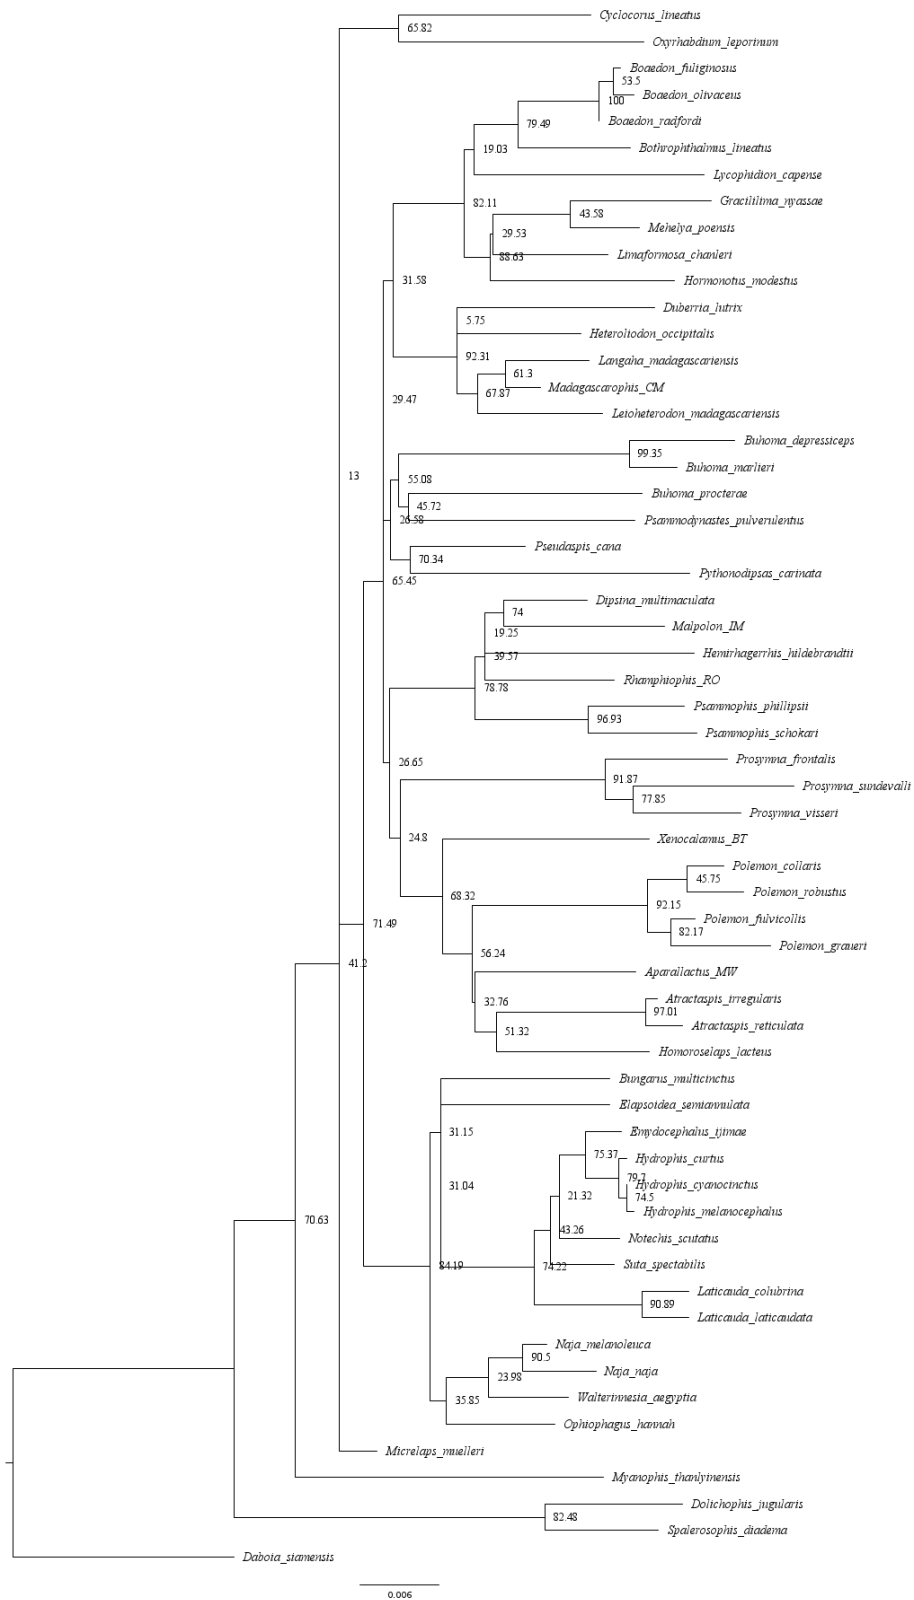

Fig. S18: Site concordance factors received by the branches in the traditional nuclear marker ML phylogeny.

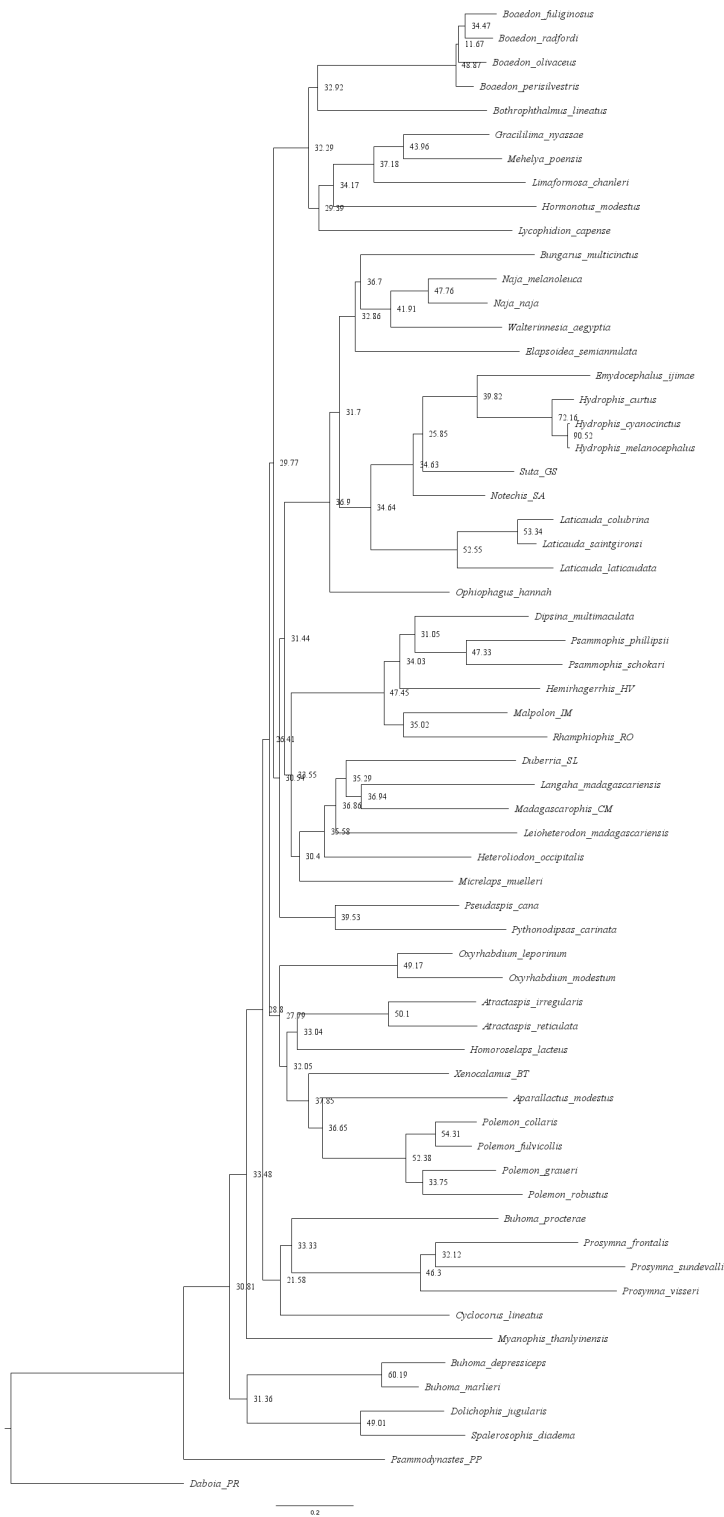

Fig. S19: Site concordance factors received by the branches in the traditional mitochondrial marker ML phylogeny.

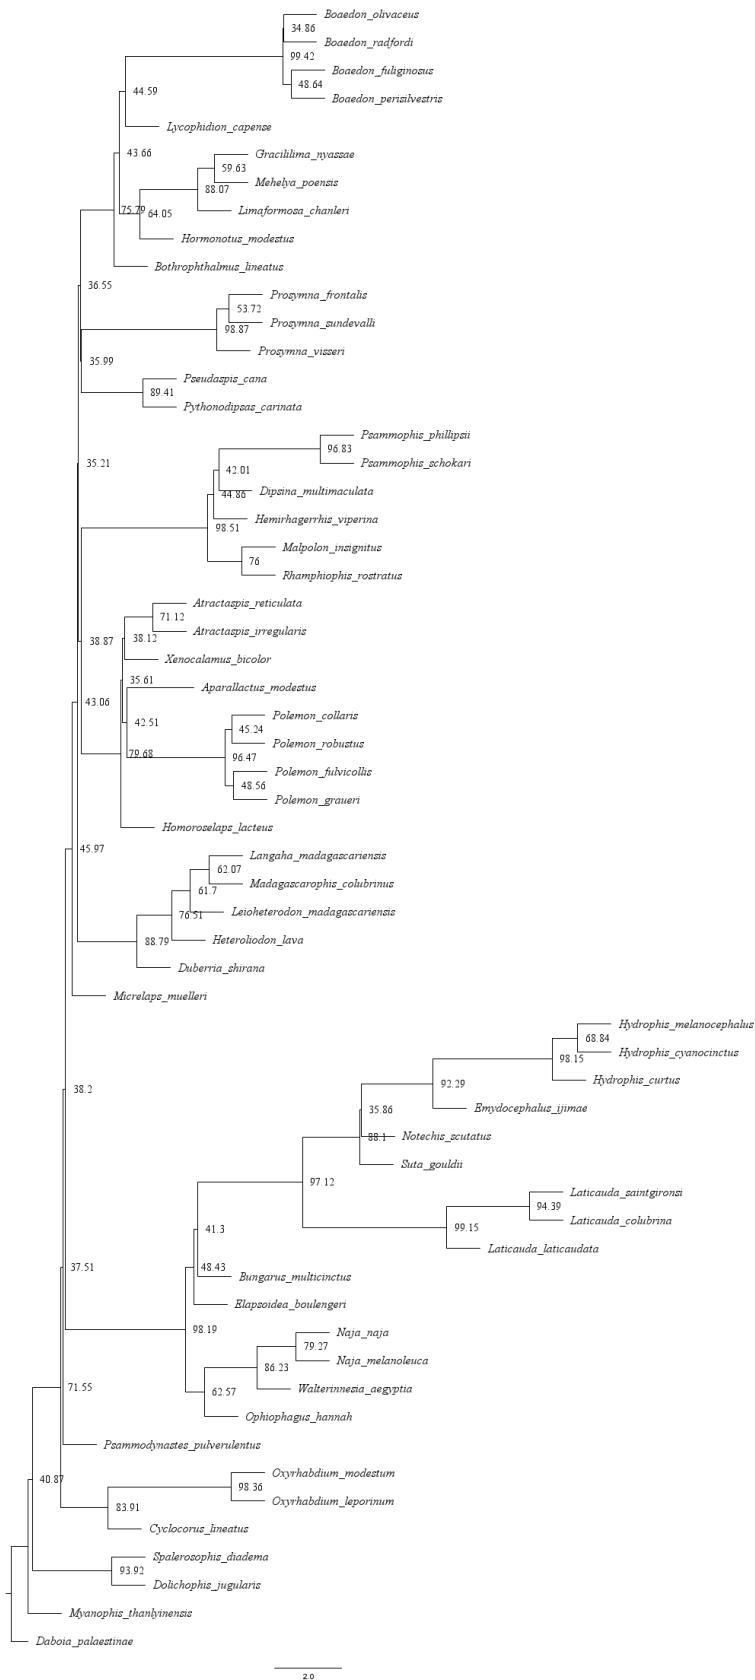

Fig. S20: Quartet support on the branches of the 50 % complete UCE wASTRAL-h phylogeny.



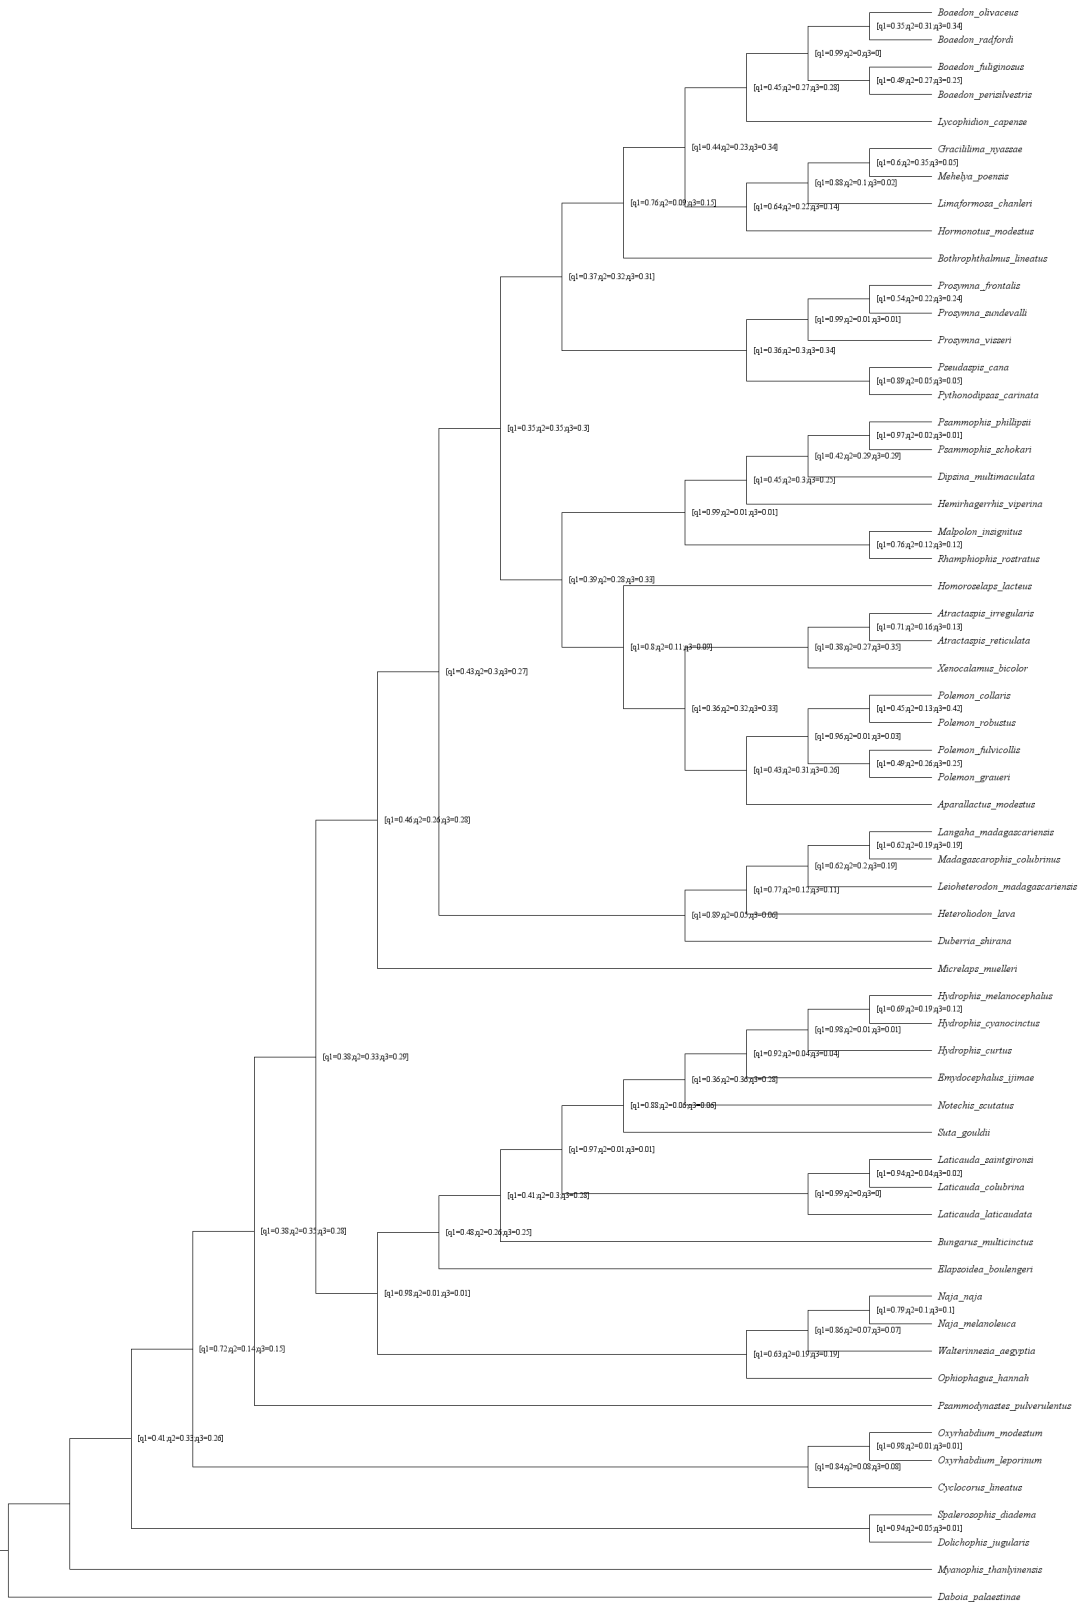

Fig. S21: Quartet support for the best and the alternative resolutions of the 50 % complete UCE wASTRAL-h phylogeny.

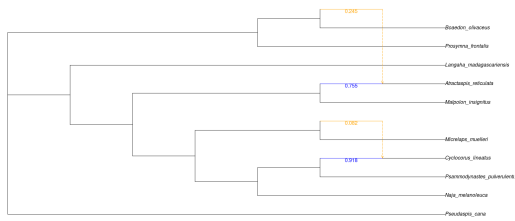

Allowed reticulations (hmax) = 2

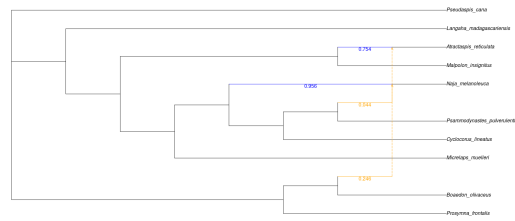

Allowed reticulations (hmax) = 5

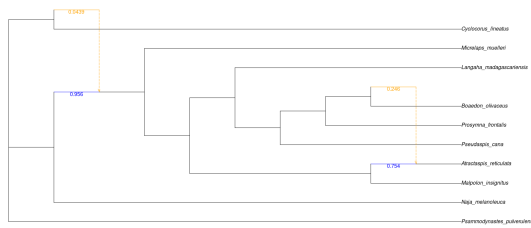

Allowed reticulations (hmax) = 6

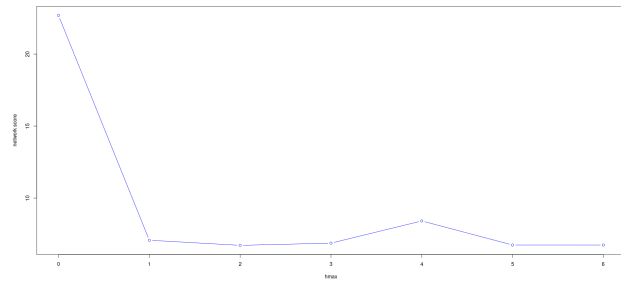

Network score (log-likelihoods treated as scores) plotted against hmax

Fig. S22: Three top log-likelihood achieving MSCNs estimated by PhyloNetworks and plot of reticulations against the log-likelihoods in the visualisation format preferred by PhyloNetworks developers.

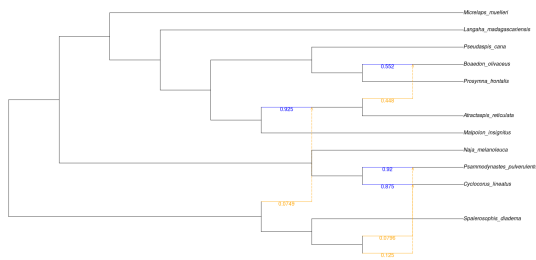

Allowed reticulations = 4

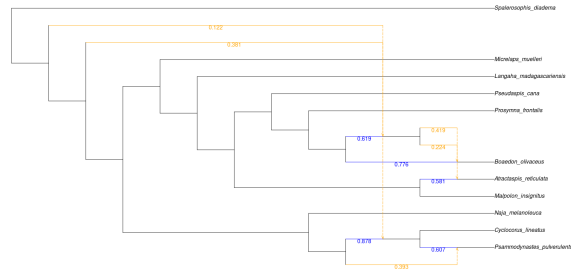

Allowed reticulations = 5

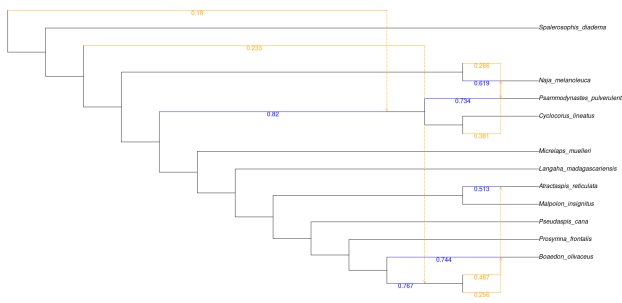

Allowed reticulations = 6

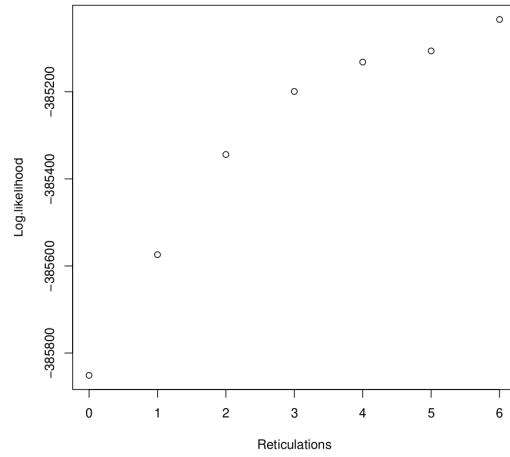

Log-likelihoods plotted against reticulations

Fig. S23: Three top log-likelihood achieving MSCNs estimated by PhyloNet and plot of reticulations against the log-likelihoods (the plot basically conveys the same kind of information as in the previous figure).

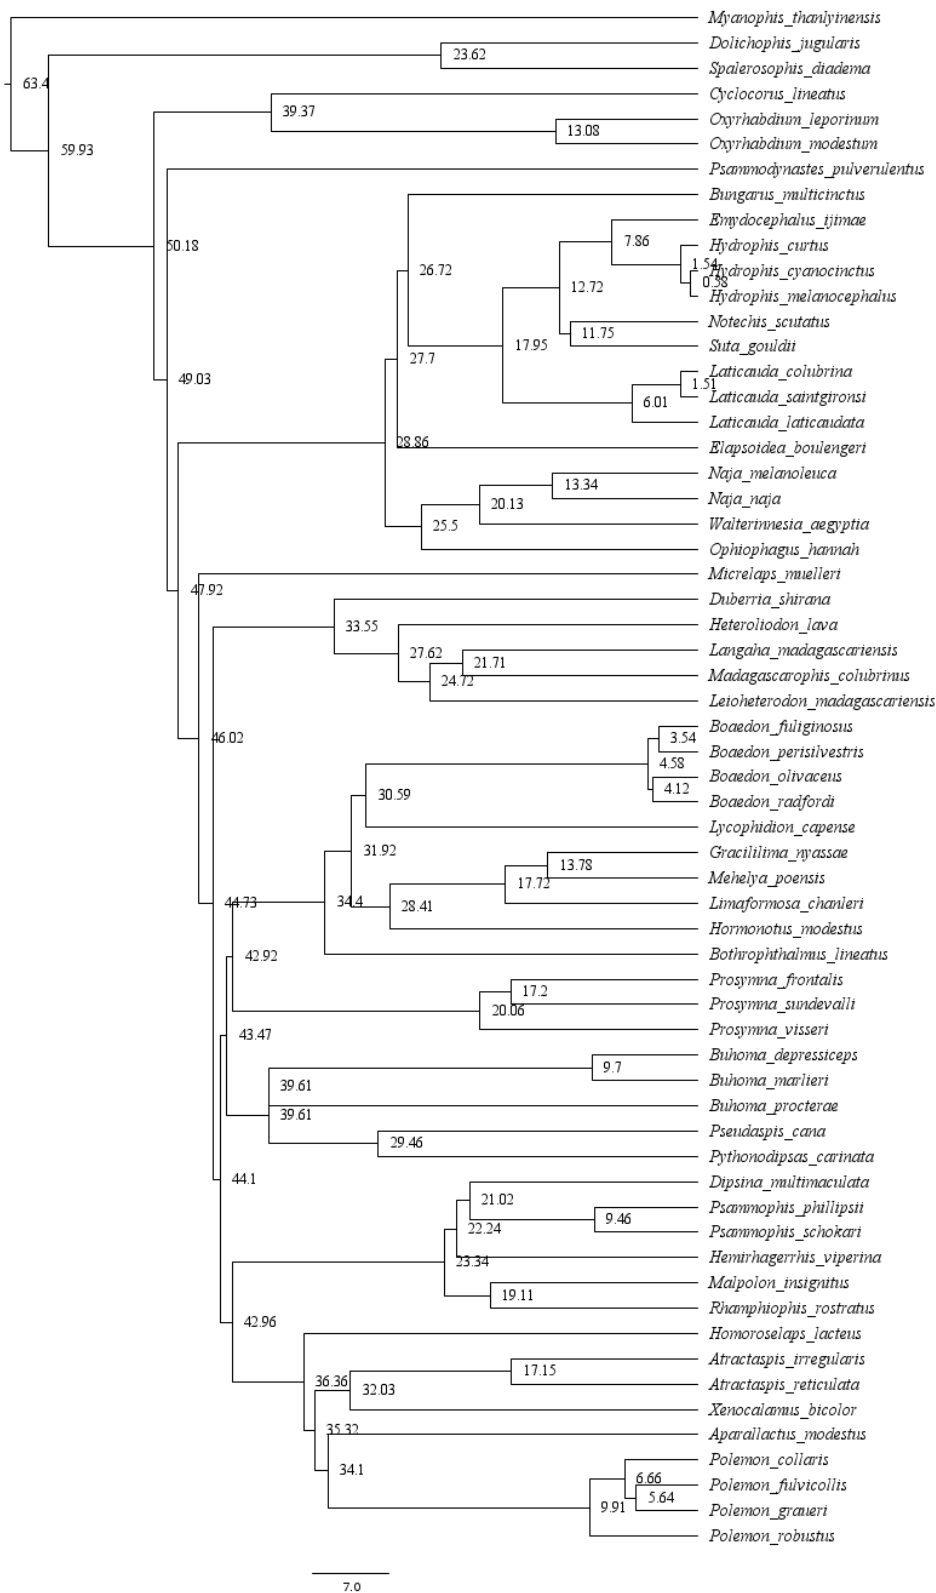

Fig. S24: Time-calibrated phylogeny of Elapoidea, from 95 % UCE and traditional nuclear loci dataset. Divergence times on the branches.

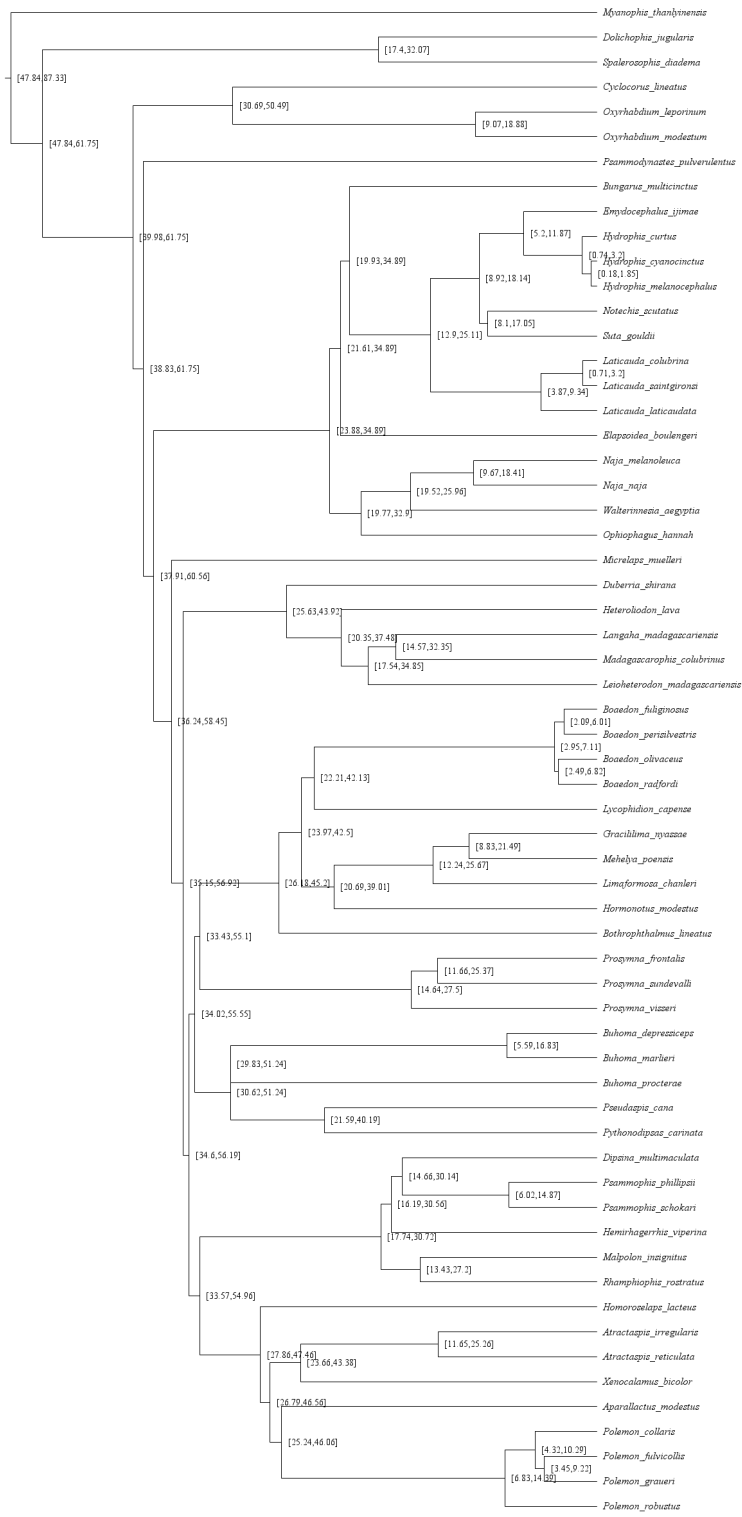

Fig. S25: Time-calibrated phylogeny of Elapoidea, from 95 % UCE and traditional nuclear loci dataset. 95 % confidence interval around the divergence times on the branches.

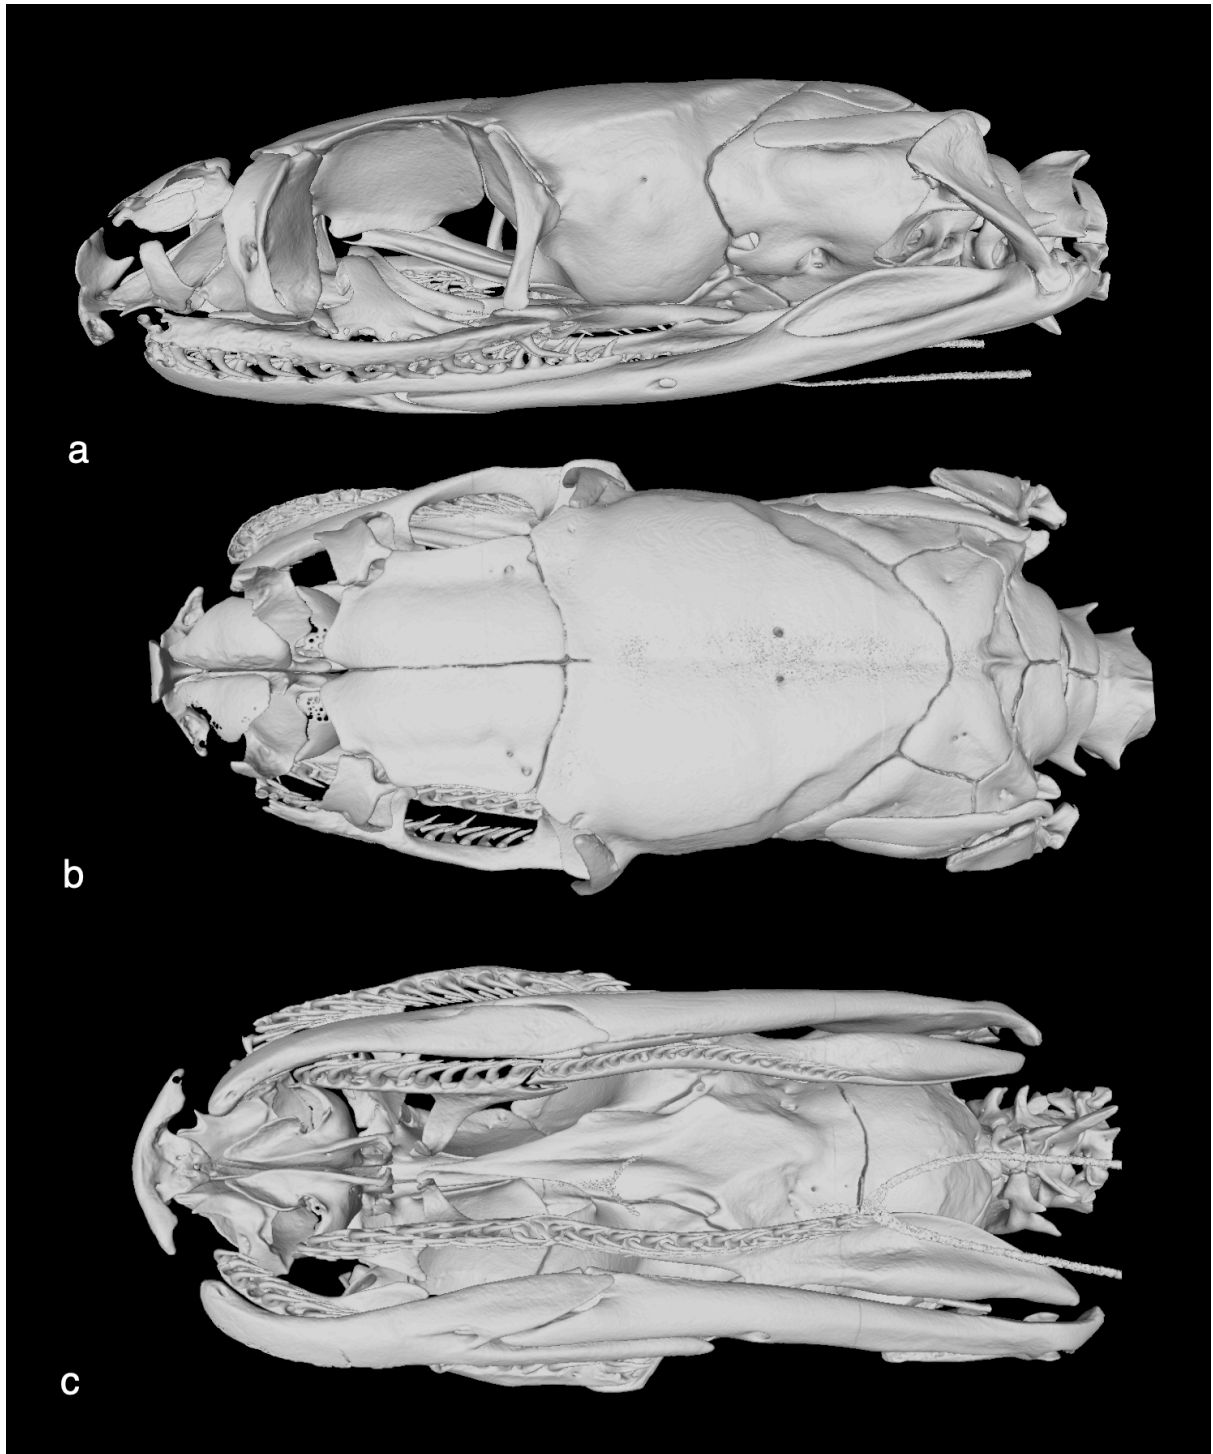

Fig. S26: Lateral (a), dorsal (b) and ventral (c) views of the cranium of *Buhoma marlieri* (BE-RBINS-VER-REP-8620)

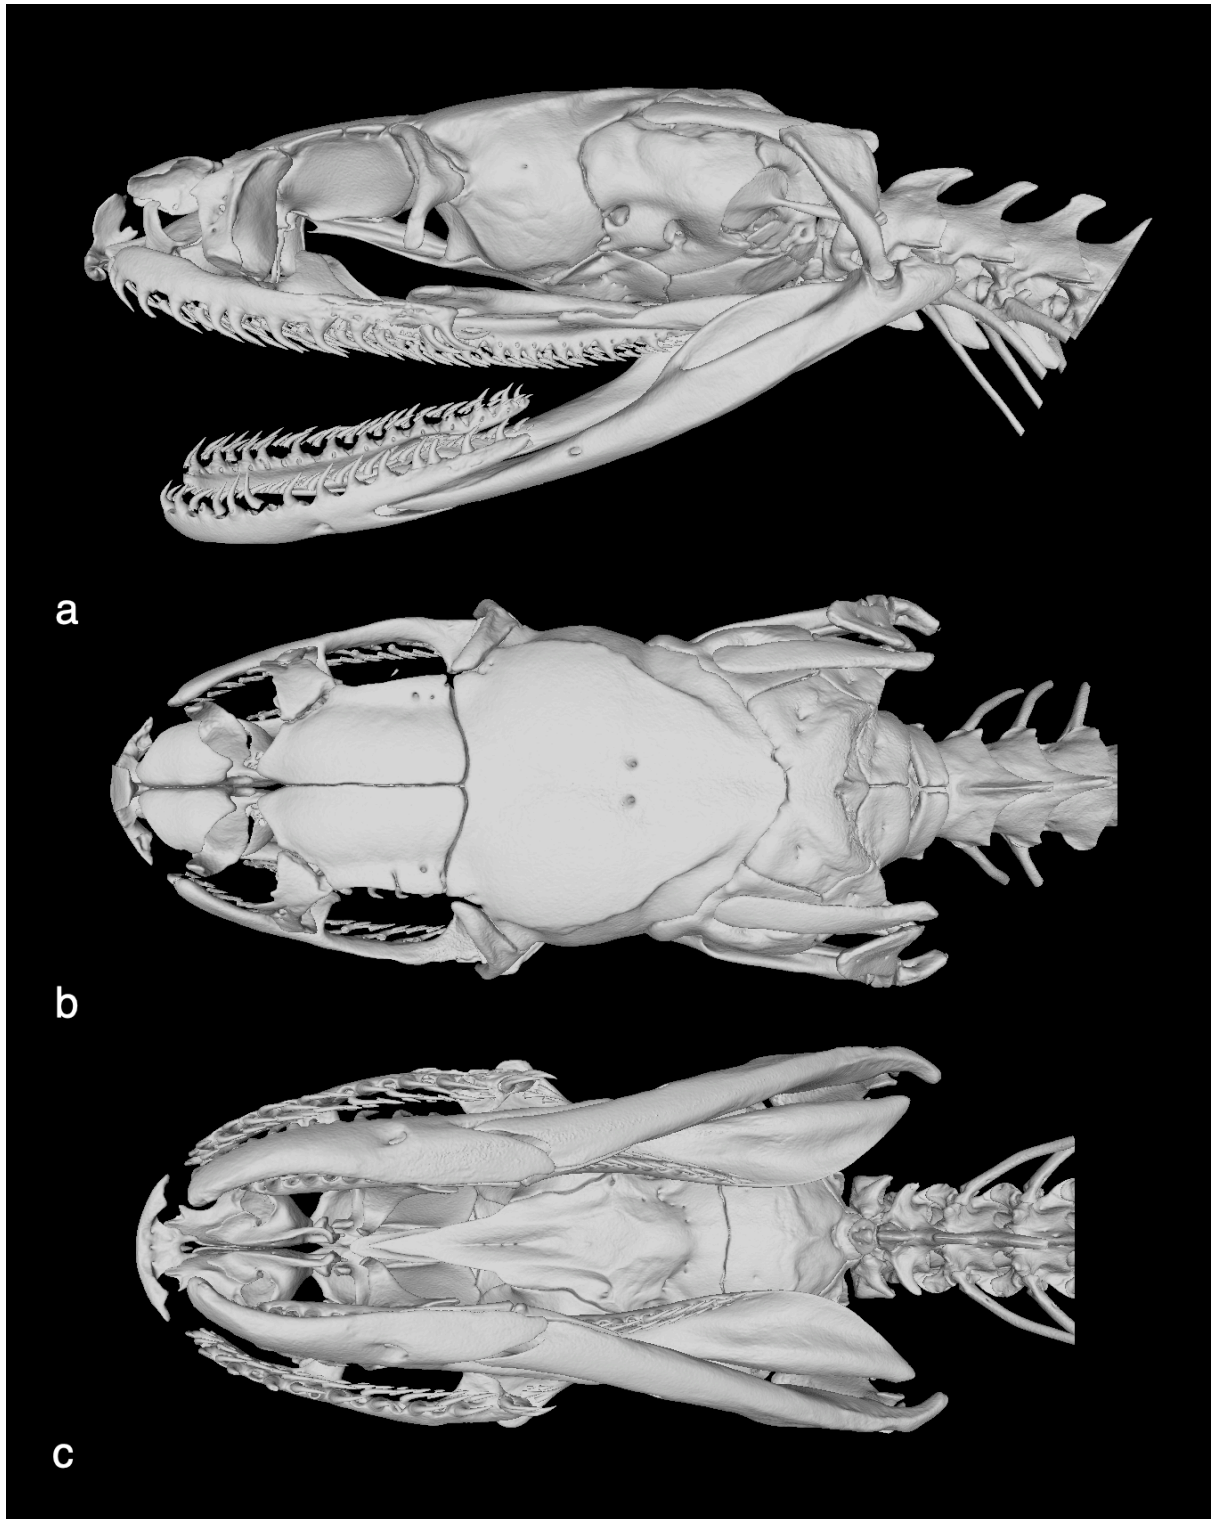

Fig. S27: Lateral (a), dorsal (b) and ventral (c) views of the cranium of the holotype of *Buhoma marlieri* (BE-RMCA-VER-REP 18091).

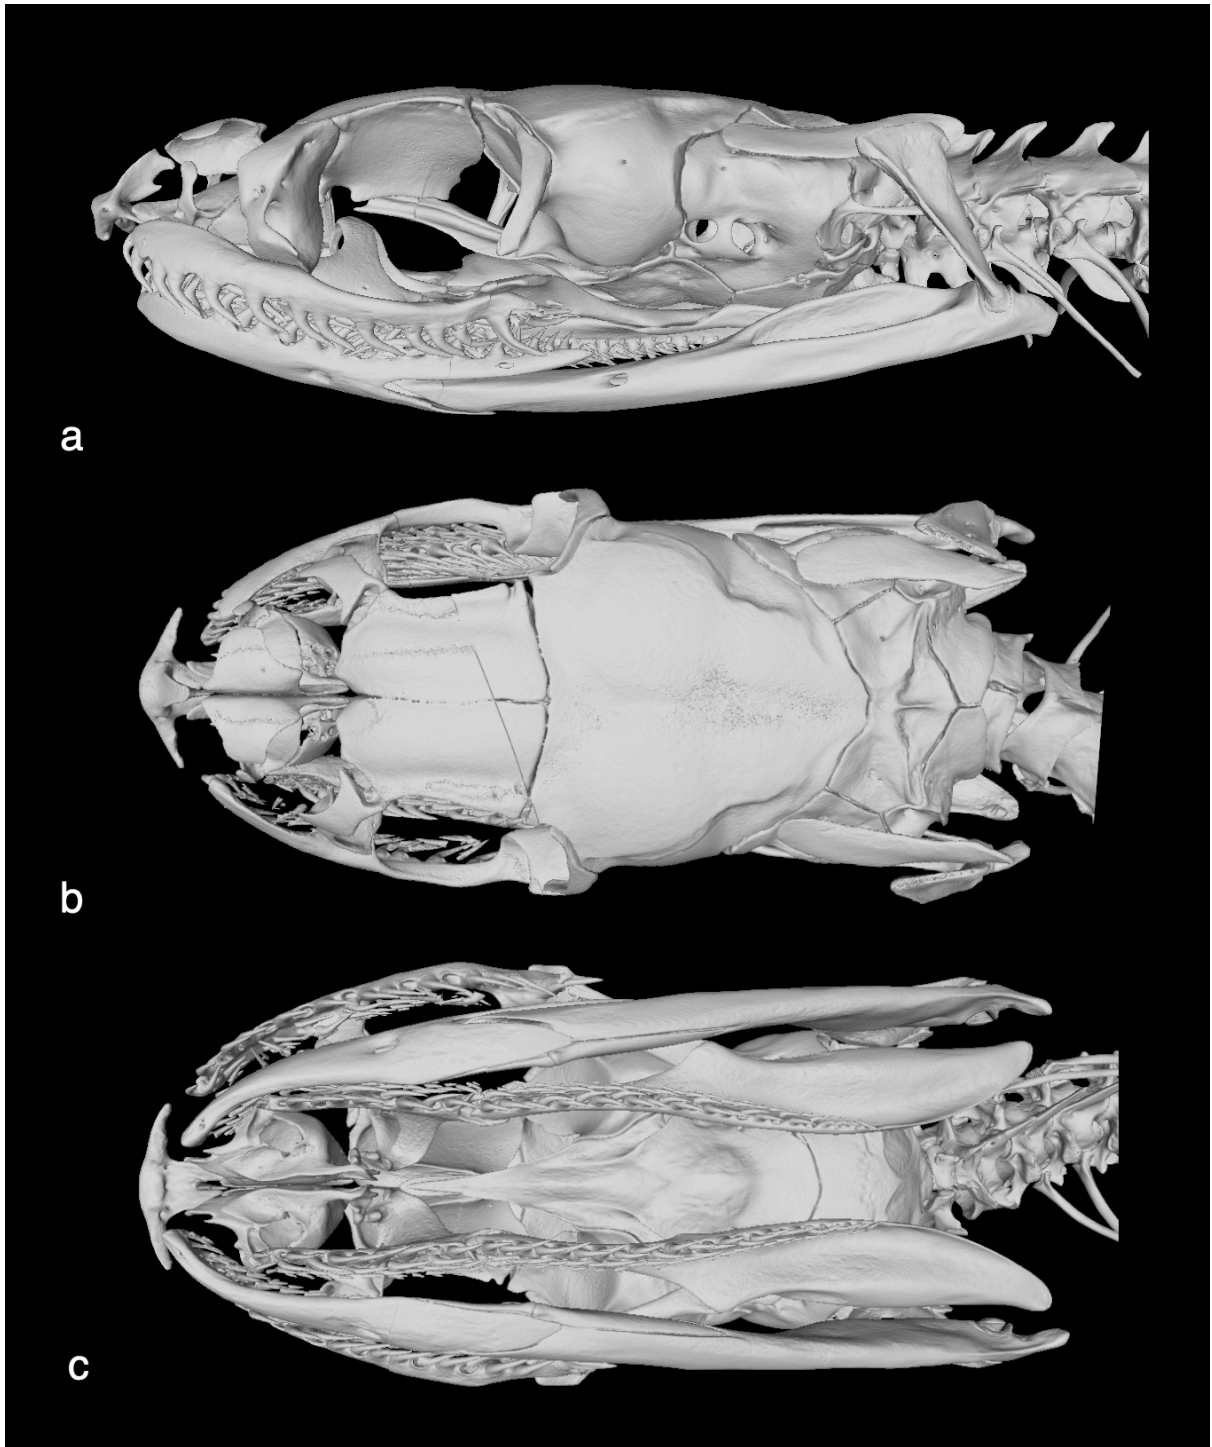

Fig. S28: Lateral (a), dorsal (b) and ventral (c) views of the cranium of *Buhoma procterae* (BE-RBINS-VER-REP-18541).



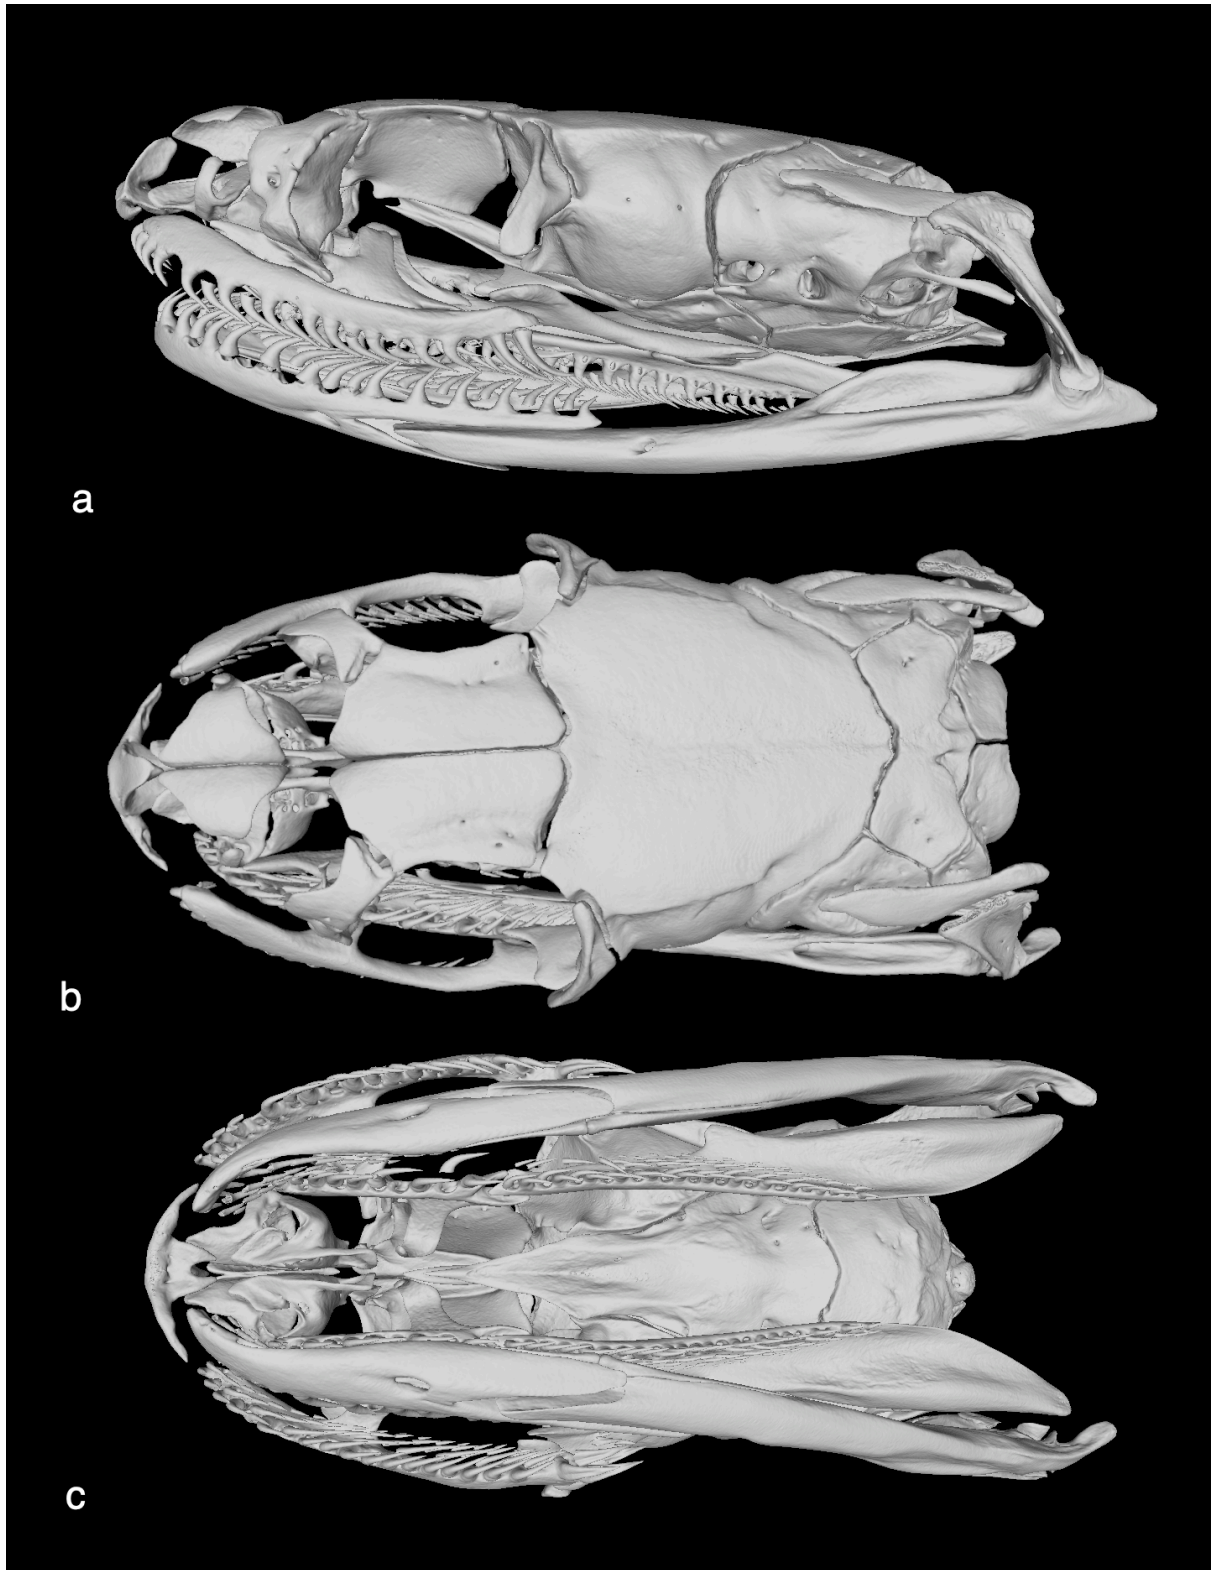

Fig. S29: Lateral (a), dorsal (b) and ventral (c) views of the cranium of *Buhoma vauerocegae* (BE-RBINS-VER-REP-18542).

## Supplementary tables

Table S1 (next page): Accession number of traditional nuclear and mitochondrial loci. The accession numbers in blue are the sequences generated in this study; ‘Reference genome’ means the sequence of the traditional nuclear marker has been harvested from the reference genome; ‘mitochondrion’ means the sequence of the mitochondrial marker has been harvested from a complete mitochondrial genome; ‘Alignment issue’ means sequence for the particular locus is available for the species in question but it does not align with most of the other sequences that were used; the first column lists the names of the species in the UCE dataset (e.g., *Heteroliodon lava* contributes the UCE sequences whereas some of the traditional marker sequences are of *H. occipitalis*; in such cases, however, an overwhelming majority of sequence data is contributed by the former); the last column lists the names used for composites in the – traditional nuclear marker dataset (traditional mito-nuclear marker dataset) [traditional mitochondrial marker datasets]; composite names are formed from the first letter of the specific epithet (e.g., *Daboia* PSR = *Daboia palaestinae* + *siamensis* + *russelii*).

| Family/subfamily               | Species (named as in the UCE data)  | <i>I2s</i>                            | <i>I6s</i>                           | <i>ND4</i>                          | <i>CYTB</i>                         | <i>BDNF</i>                         | <i>RAG1</i>                          | <i>RAG2</i>                         | <i>C-MOS</i>                          | Renaming of composites                                              |
|--------------------------------|-------------------------------------|---------------------------------------|--------------------------------------|-------------------------------------|-------------------------------------|-------------------------------------|--------------------------------------|-------------------------------------|---------------------------------------|---------------------------------------------------------------------|
| Atractaspidinae                | <i>Atractaspis reticulata</i>       | NA                                    | MK621470                             | MK621528                            | MK621586                            | NA                                  | MK621501                             | NA                                  | MK621643                              |                                                                     |
|                                | <i>Atractaspis irregularis</i>      | NA                                    | MK621473                             | MK621570                            | MK621629                            | JN614212                            | MK621517                             | NA                                  | MK621648                              |                                                                     |
|                                | <i>Aparallactus modestus</i>        | FJ404130                              | MG746954                             | MG775975                            | AY612007                            | EU402626 ( <i>A. wernerii</i> )     | MG775761                             | FJ404405                            | MG775861                              | <i>Aparallactus MW</i>                                              |
|                                | <i>Homoroselaps lacteus</i>         | KX694590                              | MK621499                             | MK621583                            | MK621641                            | JQ599029                            | MK621524                             | FJ404411                            | MK621677                              |                                                                     |
|                                | <i>Polemon collaris</i>             | FJ404139                              | MG746931                             | MG775943                            | AY612029                            | NA                                  | MG775736                             | FJ404414                            | MG775829                              |                                                                     |
|                                | <i>Polemon fulvicollis</i>          | NA                                    | MG746942                             | MG775949                            | MG746837                            | NA                                  | NA                                   | NA                                  | MG775837                              |                                                                     |
|                                | <i>Polemon graueri</i>              | NA                                    | MG746939                             | MG775948                            | MG746835                            | NA                                  | MG775742                             | NA                                  | MG775836                              |                                                                     |
|                                | <i>Polemon robustus</i>             | NA                                    | MG746937                             | MG775946                            | MG746831                            | NA                                  | MG775739                             | NA                                  | MG775832                              |                                                                     |
|                                | <i>Xenocalamus bicolor</i>          | FJ404141 ( <i>X. transvaalensis</i> ) | MG746906                             | MG775913                            | MG746796                            | NA                                  | MG775716                             | NA                                  | AY611934 ( <i>X. transvaalensis</i> ) | <i>Xenocalamus BT</i>                                               |
| <i>Buroma</i>                  | <i>Buroma procterae</i>             | FJ404148                              | AY611818                             | DQ486328                            | DQ486353                            | NA                                  | NA                                   | FJ404423                            | DQ486177                              |                                                                     |
|                                | <i>Buroma depressiceps</i>          | FJ404147                              | <a href="#">OR295386</a>             | <a href="#">OR296691</a>            | <a href="#">OR296690</a>            | <a href="#">OR296686</a>            | <a href="#">OR296692</a>             | FJ404422                            | <a href="#">OR296688</a>              |                                                                     |
|                                | <i>Buroma marlieri</i>              | NA                                    | <a href="#">OR295387</a>             | Discarded                           | Discarded                           | <a href="#">OR296687</a>            | <a href="#">OR296693</a>             | NA                                  | <a href="#">OR296689</a>              |                                                                     |
| Cyclocoridae                   | <i>Cyclocorus lineatus</i>          | NA                                    | NA                                   | NA                                  | MG458749                            | NA                                  | NA                                   | NA                                  | MG458759                              |                                                                     |
|                                | <i>Oxyrhabdium leporinum</i>        | NA                                    | NA                                   | NA                                  | MN166286                            | NA                                  | NA                                   | FJ404466                            | MN166283                              |                                                                     |
|                                | <i>Oxyrhabdium modestum</i>         | NA                                    | NA                                   | NA                                  | MG458756                            | NA                                  | NA                                   | NA                                  | NA                                    |                                                                     |
| Psammodynastidae<br>new family | <i>Psammodynastes pulverulentus</i> | MK065545                              | MK194116                             | KX660600 ( <i>P. pictus</i> )       | AF471031                            | Reference genome                    | Reference genome                     | Reference genome                    | Reference genome                      | <i>Psammodynastes PP</i><br>( <i>Psammodynastes pulverulentus</i> ) |
| Elapidae                       | <i>Emydocephalus ijimae</i>         | NC_066234 (mitochondrion)             | NC_066234 (mitochondrion)            | NC_066234 (mitochondrion)           | NC_066234 (mitochondrion)           | Reference genome                    | Reference genome                     | Reference genome                    | Reference genome                      |                                                                     |
|                                | <i>Elapsoidea boulengeri</i>        | AF544745 ( <i>E. semiannulata</i> )   | JF357946 ( <i>E. semiannulatus</i> ) | JF357928 ( <i>E. semiannulata</i> ) | AF039260 ( <i>E. semiannulata</i> ) | FJ433987 ( <i>E. semiannulata</i> ) | Alignment issue                      | EF144098 ( <i>E. semiannulata</i> ) | AF544678 ( <i>E. semiannulata</i> )   | <i>Elapsoidea semiannulata</i>                                      |
|                                | <i>Bungarus multicinctus</i>        | MK065561                              | MK194133                             | MN165167                            | AJ565002                            | Reference genome                    | Reference genome                     | Reference genome                    | Reference genome                      |                                                                     |
|                                | <i>Laticauda laticaudata</i>        | KX239655                              | KX239663                             | FJ606538                            | AB701328                            | Reference genome                    | Reference genome                     | Reference genome                    | Reference genome                      |                                                                     |
|                                | <i>Laticauda colubrina</i>          | KX239654                              | MK193892                             | EU546998                            | KX239643                            | Reference genome                    | Reference genome                     | Reference genome                    | Reference genome                      |                                                                     |
|                                | <i>Laticauda saintgironsi</i>       | NA                                    | NA                                   | FJ606507                            | NA                                  | NA                                  | NA                                   | NA                                  | NA                                    |                                                                     |
|                                | <i>Hydrophis cyanocinctus</i>       | KX239648                              | MK194271                             | FJ593215                            | KX239640                            | Reference genome                    | Reference genome                     | Reference genome                    | Reference genome                      |                                                                     |
|                                | <i>Hydrophis curtus</i>             | KX239653                              | KJ653939                             | KJ653856                            | KJ653904                            | Reference genome                    | Reference genome                     | Reference genome                    | Reference genome                      |                                                                     |
|                                | <i>Hydrophis melanocephalus</i>     | MK775532 (mitochondrion)              | MK775532 (mitochondrion)             | MK775532 (mitochondrion)            | MK775532 (mitochondrion)            | Reference genome                    | Reference genome                     | Reference genome                    | Reference genome                      |                                                                     |
|                                | <i>Notechis scutatus</i>            | U96802                                | KU323981                             | EU547034 ( <i>N. ater</i> )         | LC640464                            | Reference genome                    | Reference genome                     | Reference genome                    | Reference genome                      | <i>Notechis SA</i> ( <i>Notechis scutatus</i> )                     |
|                                | <i>Naja naja</i>                    | EU547088                              | GQ359756                             | MT346908                            | MT346712                            | Reference genome                    | Reference genome                     | Reference genome                    | Reference genome                      |                                                                     |
|                                | <i>Naja melanoleuca</i>             | U96801                                | MF497427                             | MH337394                            | MH337588                            | NA                                  | MT347390                             | NA                                  | AY611904                              |                                                                     |
|                                | <i>Ophiophagus hannah</i>           | JN687930                              | JN687931                             | MZ343823                            | MZ343887                            | Reference genome                    | Reference genome                     | Reference genome                    | Reference genome                      |                                                                     |
|                                | <i>Suta gouldii</i>                 | NA                                    | NA                                   | MT151759                            | NA                                  | NA                                  | EU546889 ( <i>Suta spectabilis</i> ) | NA                                  | EU546928 ( <i>Suta spectabilis</i> )  | <i>Suta GS</i> ( <i>Suta spectabilis</i> )                          |
|                                | <i>Walterinnesia aegyptia</i>       | U96807                                | HQ267785                             | MT346955                            | MT346782                            | NA                                  | MT347441                             | NA                                  | MT347033                              |                                                                     |
| Lamprophiinae                  | <i>Boaedon fuliginosus</i>          | FJ404165                              | AY611881                             | KM519696                            | KM519716                            | EU402646                            | KM519732                             | FJ404438                            | FJ404266                              |                                                                     |
|                                | <i>Boaedon olivaceus</i>            | FJ404170                              | KX277253                             | KM519697                            | KM519717                            | NA                                  | KM519731                             | FJ404443                            | FJ404271                              |                                                                     |
|                                | <i>Boaedon perisilvestris</i>       | NA                                    | KX249794                             | NA                                  | NA                                  | NA                                  | NA                                   | NA                                  | NA                                    |                                                                     |
|                                | <i>Boaedon radfordi</i>             | NA                                    | NA                                   | KM519694                            | KM519713                            | NA                                  | KM519728                             | NA                                  | KM519748                              |                                                                     |
|                                | <i>Bothrophthalmus lineatus</i>     | FJ404146                              | FJ404198                             | FJ404349                            | LC640409                            | NA                                  | NA                                   | FJ404421                            | FJ404251                              |                                                                     |
|                                | <i>Hormonotus modestus</i>          | FJ404159                              | FJ404195                             | FJ404360                            | FJ404296                            | NA                                  | NA                                   | FJ404433                            | FJ404261                              |                                                                     |
|                                | <i>Gracililima nyassae</i>          | FJ404182                              | AY611896                             | HQ207150                            | MF804432                            | NA                                  | NA                                   | NA                                  | MF804462                              |                                                                     |

|                         |                                       |                                      |                                      |                                       |                                    |                                       |                                       |                                       |                                      |                                                         |
|-------------------------|---------------------------------------|--------------------------------------|--------------------------------------|---------------------------------------|------------------------------------|---------------------------------------|---------------------------------------|---------------------------------------|--------------------------------------|---------------------------------------------------------|
|                         | <i>Limaformosa chanleri</i>           | NA                                   | NA                                   | NA                                    | MF804439                           | NA                                    | NA                                    | NA                                    | MF804469                             |                                                         |
|                         | <i>Lycopodium capense</i>             | FJ404178                             | AY611838                             | FJ404376                              | MT433521                           | EU402652                              | Alignment issue                       | FJ404450                              | AY611930                             |                                                         |
|                         | <i>Mehelya poensis</i>                | FJ404183                             | AY611863                             | FJ404380                              | AY612045                           | NA                                    | NA                                    | FJ404454                              | AY611954                             |                                                         |
| Micrelapidae            | <i>Micrelaps muelleri</i>             | NA                                   | NA                                   | MG776013                              | MW075289                           | NA                                    | NA                                    | NA                                    | MW075300                             |                                                         |
| Prosymninae             | <i>Prosymna frontalis</i>             | KR814630                             | KR814655                             | KR814707                              | MT482414                           | NA                                    | MT460640                              | NA                                    | MT460582                             |                                                         |
|                         | <i>Prosymna sundevalli</i>            | NA                                   | NA                                   | NA                                    | MT482424                           | NA                                    | MT460650                              | NA                                    | MT460590                             |                                                         |
|                         | <i>Prosymna visseri</i>               | FJ404192                             | AY188072                             | NA                                    | MT482427                           | NA                                    | MT460652                              | FJ404463                              | FJ404292                             |                                                         |
| Psammophiinae           | <i>Dipsina multimaculata</i>          | NA                                   | NA                                   | DQ486332                              | DQ486357                           | NA                                    | NA                                    | NA                                    | DQ486181                             |                                                         |
|                         | <i>Hemirhagerrhis viperina</i>        | FJ404134 ( <i>H. hildebrandtii</i> ) | FJ404214 ( <i>H. hildebrandtii</i> ) | DQ486289                              | DQ486453                           | NA                                    | NA                                    | FJ404409 ( <i>H. hildebrandtii</i> )  | FJ404239 ( <i>H. hildebrandtii</i> ) | <i>Hemirhagerrhis HV (Hemirhagerrhis hildebrandtii)</i> |
|                         | <i>Malpolon insignitus</i>            | DQ451951                             | AY611851                             | FJ404320 ( <i>M. monspessulanus</i> ) | AY612033                           | OL547595 ( <i>M. monspessulanus</i> ) | KY762208 ( <i>M. monspessulanus</i> ) | FJ404390 ( <i>M. monspessulanus</i> ) | AY611942                             | <i>Malpolon IM</i>                                      |
|                         | <i>Rhamphiophis rostratus</i>         | FJ404126                             | AY611897                             | FJ404329                              | DQ486394                           | JQ599049 ( <i>R. oxyrhynchus</i> )    | NA                                    | FJ404401                              | DQ486187                             | <i>Rhamphiophis RO</i>                                  |
|                         | <i>Psammophis phillipsii</i>          | FJ404120                             | MK005716                             | MK032669                              | LC640454                           | NA                                    | NA                                    | FJ404395                              | AY611970                             |                                                         |
|                         | <i>Psammophis schokari</i>            | HQ658448                             | HQ658453                             | MG003080                              | MG003028                           | NA                                    | NA                                    | FJ404396                              | MG002958                             |                                                         |
| Pseudaspidinae          | <i>Pseudaspis cana</i>                | FJ404187                             | AY611898                             | FJ404384                              | AY612080                           | NA                                    | NA                                    | FJ404458                              | AY058942                             |                                                         |
|                         | <i>Pythonodipsas carinata</i>         | FJ404189                             | AY188075                             | FJ404386                              | AY188036                           | NA                                    | NA                                    | FJ404460                              | AY187997                             |                                                         |
| Pseudoxyrhophiinae      | <i>Duberria shirana</i>               | FJ404154 ( <i>D. lutrix</i> )        | KX694640 ( <i>D. lutrix</i> )        | LR798686 ( <i>D. lutrix</i> )         | LR798605                           | NA                                    | KX695083 ( <i>D. lutrix</i> )         | FJ404428 ( <i>D. lutrix</i> )         | AF471138 ( <i>D. lutrix</i> )        | <i>Duberria SL (Duberria lutrix)</i>                    |
|                         | <i>Heteroliodon lava</i>              | FJ404158 ( <i>H. occipitalis</i> )   | FJ404211 ( <i>H. occipitalis</i> )   | NA                                    | FJ404308 ( <i>H. occipitalis</i> ) | NA                                    | NA                                    | FJ404432 ( <i>H. occipitalis</i> )    | FJ387211 ( <i>H. occipitalis</i> )   | <i>Heteroliodon occipitalis</i>                         |
|                         | <i>Langaha madagascariensis</i>       | FJ404172                             | AY188059                             | FJ404370                              | AY188020                           | NA                                    | NA                                    | FJ404445                              | AY187981                             |                                                         |
|                         | <i>Leioheterodon madagascariensis</i> | KX694599                             | AF544797                             | FJ404371                              | KX694881                           | FJ433992                              | Alignment issue                       | EF144103                              | KX694824                             |                                                         |
|                         | <i>Madagascarophis colubrinus</i>     | FJ404181 ( <i>M. meridionalis</i> )  | MG189475                             | MCU49313                              | AY586253                           | JQ073077 ( <i>M. meridionalis</i> )   | NA                                    | KU925301                              | AY586226                             | <i>Madagascarophis CM</i>                               |
| Colubridae (outgroup)   | <i>Dolichophis jugularis</i>          | AY039152                             | AY376769                             | AY487046                              | AY486917                           | NA                                    | NA                                    | NA                                    | AY486941                             |                                                         |
|                         | <i>Spalerosophis diadema</i>          | AY039148                             | MG700257                             | AY487059                              | AY486926                           | NA                                    | Alignment issue                       | NA                                    | AY486950                             |                                                         |
| Homalopsidae (outgroup) | <i>Myanophis thanlyinensis</i>        | NC_060375 (mitochondrion)            | NC_060375 (mitochondrion)            | NC_060375 (mitochondrion)             | NC_060375 (mitochondrion)          | Reference genome                      | Reference genome                      | Reference genome                      | Reference genome                     |                                                         |
| Viperidae (outgroup)    | <i>Daboia palaestinae</i>             | JN870183                             | AJ275775                             | DQ305477 ( <i>D. russelii</i> )       | MF140586                           | LC519947 ( <i>D. siamensis</i> )      | Reference genome                      | MK194871 ( <i>D. siamensis</i> )      | Reference genome                     | <i>Daboia PSR (Daboia siamensis) [Daboia PR]</i>        |

Table S2–S5: Accession number of query sequences used to perform BLAST search against a reference genome to locate and extract a particular nuclear gene.

Table S2

| Query    | Subject genome                      | Gene targeted |
|----------|-------------------------------------|---------------|
| EU402646 | <i>Psammodynastes pulverulentus</i> | <i>BDNF</i>   |
| FJ433986 | <i>Myanophis thalyinensis</i>       | <i>BDNF</i>   |
| FJ433990 | <i>Hydrophis curtus</i>             | <i>BDNF</i>   |
| FJ433990 | <i>Hydrophis melanocephalus</i>     | <i>BDNF</i>   |
| FJ433990 | <i>Hydrophis cyanocinctus</i>       | <i>BDNF</i>   |
| FJ433990 | <i>Emydocephalus ijimae</i>         | <i>BDNF</i>   |
| FJ433990 | <i>Laticauda colubrina</i>          | <i>BDNF</i>   |
| FJ433990 | <i>Laticauda laticaudata</i>        | <i>BDNF</i>   |
| EU402656 | <i>Notechis scutatus</i>            | <i>BDNF</i>   |
| LC519961 | <i>Ophiophagus hannah</i>           | <i>BDNF</i>   |
| FJ433990 | <i>Bungarus multicinctus</i>        | <i>BDNF</i>   |
| LC533897 | <i>Naja naja</i>                    | <i>BDNF</i>   |

Table S3

| Query    | Subject genome                      | Gene targeted |
|----------|-------------------------------------|---------------|
| MG458761 | <i>Psammodynastes pulverulentus</i> | <i>C-MOS</i>  |
| JX463013 | <i>Myanophis thanlyinensis</i>      | <i>C-MOS</i>  |
| KT965865 | <i>Hydrophis curtus</i>             | <i>C-MOS</i>  |
| KT965865 | <i>Hydrophis melanocephalus</i>     | <i>C-MOS</i>  |
| KT965865 | <i>Hydrophis cyanocinctus</i>       | <i>C-MOS</i>  |

|          |                              |       |
|----------|------------------------------|-------|
| KT965865 | <i>Emydocephalus ijimae</i>  | C-MOS |
| AF544702 | <i>Laticauda colubrina</i>   | C-MOS |
| AF544702 | <i>Laticauda laticaudata</i> | C-MOS |
| EU546944 | <i>Notechis scutatus</i>     | C-MOS |
| KX694798 | <i>Ophiophagus hannah</i>    | C-MOS |
| AY058924 | <i>Bungarus multicinctus</i> | C-MOS |
| EU366445 | <i>Naja naja</i>             | C-MOS |
| AF471156 | <i>Daboia siamensis</i>      | C-MOS |

Table S4

| Query    | Subject genome                      | Gene targeted |
|----------|-------------------------------------|---------------|
| MT347390 | <i>Psammodynastes pulverulentus</i> | <i>RAG1</i>   |
| EU546908 | <i>Myanophis thanlyinensis</i>      | <i>RAG1</i>   |
| EU546889 | <i>Hydrophis curtus</i>             | <i>RAG1</i>   |
| EU546889 | <i>Hydrophis melanocephalus</i>     | <i>RAG1</i>   |
| EU546889 | <i>Hydrophis cyanocinctus</i>       | <i>RAG1</i>   |
| EU546908 | <i>Emydocephalus ijimae</i>         | <i>RAG1</i>   |
| EU546908 | <i>Laticauda colubrina</i>          | <i>RAG1</i>   |
| EU546908 | <i>Laticauda laticaudata</i>        | <i>RAG1</i>   |
| EU546905 | <i>Notechis scutatus</i>            | <i>RAG1</i>   |
| MZ753612 | <i>Ophiophagus hannah</i>           | <i>RAG1</i>   |
| JF357954 | <i>Bungarus multicinctus</i>        | <i>RAG1</i>   |
| MT347390 | <i>Naja naja</i>                    | <i>RAG1</i>   |
| EU546908 | <i>Daboia siamensis</i>             | <i>RAG1</i>   |

Table S5

| Query    | Subject genome                      | Gene targeted |
|----------|-------------------------------------|---------------|
| MK194960 | <i>Psammodynastes pulverulentus</i> | <i>RAG2</i>   |
| EF144097 | <i>Myanophis thanlyinensis</i>      | <i>RAG2</i>   |
| MK195117 | <i>Hydrophis curtus</i>             | <i>RAG2</i>   |
| MK195117 | <i>Hydrophis melanocephalus</i>     | <i>RAG2</i>   |
| MK195117 | <i>Hydrophis cyanocinctus</i>       | <i>RAG2</i>   |
| MK195117 | <i>Emydocephalus ijimae</i>         | <i>RAG2</i>   |
| MK194731 | <i>Laticauda colubrina</i>          | <i>RAG2</i>   |
| MK194731 | <i>Laticauda laticaudata</i>        | <i>RAG2</i>   |
| MK195117 | <i>Notechis scutatus</i>            | <i>RAG2</i>   |
| MK194875 | <i>Ophiophagus hannah</i>           | <i>RAG2</i>   |
| MK195078 | <i>Bungarus multicinctus</i>        | <i>RAG2</i>   |
| MK195061 | <i>Naja naja</i>                    | <i>RAG2</i>   |

Table S6: MorphoSource ark number+links to the slices and 3D volumes of the micro-CT scans generated in this study

| Catalogue number           | Species                   | Slices                                                                                | 3DModel                                                                               |
|----------------------------|---------------------------|---------------------------------------------------------------------------------------|---------------------------------------------------------------------------------------|
| BE-RBINS-VER-<br>REP-43    | <i>Ophiophagus hannah</i> | <a href="http://n2t.net/ark:/87602/m4/541884">http://n2t.net/ark:/87602/m4/541884</a> | <a href="http://n2t.net/ark:/87602/m4/541004">http://n2t.net/ark:/87602/m4/541004</a> |
| BE-RBINS-VER-<br>REP-19300 | <i>Naja melanoleuca</i>   | <a href="http://n2t.net/ark:/87602/m4/541887">http://n2t.net/ark:/87602/m4/541887</a> | <a href="http://n2t.net/ark:/87602/m4/541011">http://n2t.net/ark:/87602/m4/541011</a> |
| BE-RBINS-VER-<br>REP-19104 | <i>Naja annulata</i>      | <a href="http://n2t.net/ark:/87602/m4/541890">http://n2t.net/ark:/87602/m4/541890</a> | <a href="http://n2t.net/ark:/87602/m4/541017">http://n2t.net/ark:/87602/m4/541017</a> |

|                         |                                               |                                                                                       |                                                                                       |
|-------------------------|-----------------------------------------------|---------------------------------------------------------------------------------------|---------------------------------------------------------------------------------------|
| BE-RBINS-VER-TYPES-2612 | <i>Elapsoidea trapei</i>                      | <a href="http://n2t.net/ark:/87602/m4/541893">http://n2t.net/ark:/87602/m4/541893</a> | <a href="http://n2t.net/ark:/87602/m4/541034">http://n2t.net/ark:/87602/m4/541034</a> |
| BE-RBINS-VER-REP-8408   | <i>Pseudaspis cana</i>                        | <a href="http://n2t.net/ark:/87602/m4/541039">http://n2t.net/ark:/87602/m4/541039</a> | <a href="http://n2t.net/ark:/87602/m4/541896">http://n2t.net/ark:/87602/m4/541896</a> |
| BE-RBINS-VER-REP-19125  | <i>Mehelya poensis</i>                        | <a href="http://n2t.net/ark:/87602/m4/541899">http://n2t.net/ark:/87602/m4/541899</a> | <a href="http://n2t.net/ark:/87602/m4/541043">http://n2t.net/ark:/87602/m4/541043</a> |
| BE-RMCA-VER-R.30641     | <i>Mehelya nyassae</i>                        | <a href="http://n2t.net/ark:/87602/m4/541072">http://n2t.net/ark:/87602/m4/541072</a> | <a href="http://n2t.net/ark:/87602/m4/541082">http://n2t.net/ark:/87602/m4/541082</a> |
| BE-RBINS-VER-REP-18885  | <i>Boaedon olivaceus</i>                      | <a href="http://n2t.net/ark:/87602/m4/541052">http://n2t.net/ark:/87602/m4/541052</a> | <a href="http://n2t.net/ark:/87602/m4/541054">http://n2t.net/ark:/87602/m4/541054</a> |
| BE-RMCA-VER-REP-14864   | <i>Lycodonomorphus subtaeniatus</i>           | <a href="http://n2t.net/ark:/87602/m4/541669">http://n2t.net/ark:/87602/m4/541669</a> | <a href="http://n2t.net/ark:/87602/m4/541671">http://n2t.net/ark:/87602/m4/541671</a> |
| BE-RBINS-VER-REP-18542  | <i>Buhoma vauerocegae</i>                     | <a href="http://n2t.net/ark:/87602/m4/541059">http://n2t.net/ark:/87602/m4/541059</a> | <a href="http://n2t.net/ark:/87602/m4/541061">http://n2t.net/ark:/87602/m4/541061</a> |
| BE-RMCA-VER-REP 18091   | <i>Buhoma marlieri</i> Holotype               | <a href="http://n2t.net/ark:/87602/m4/543336">http://n2t.net/ark:/87602/m4/543336</a> | <a href="http://n2t.net/ark:/87602/m4/543342">http://n2t.net/ark:/87602/m4/543342</a> |
| BE-RBINS-VER-REP-8620   | <i>Buhoma marlieri</i>                        | <a href="http://n2t.net/ark:/87602/m4/541067">http://n2t.net/ark:/87602/m4/541067</a> | <a href="http://n2t.net/ark:/87602/m4/541075">http://n2t.net/ark:/87602/m4/541075</a> |
| BE-RBINS-VER-REP-16404  | <i>Buhoma depressiceps</i>                    | <a href="http://n2t.net/ark:/87602/m4/541080">http://n2t.net/ark:/87602/m4/541080</a> | <a href="http://n2t.net/ark:/87602/m4/541091">http://n2t.net/ark:/87602/m4/541091</a> |
| BE-RBINS-VER-REP-18541  | <i>Buhoma procterae</i>                       | <a href="http://n2t.net/ark:/87602/m4/541676">http://n2t.net/ark:/87602/m4/541676</a> | <a href="http://n2t.net/ark:/87602/m4/541678">http://n2t.net/ark:/87602/m4/541678</a> |
| RBINS 9284              | <i>Psammophis mossambicus</i>                 | <a href="http://n2t.net/ark:/87602/m4/541683">http://n2t.net/ark:/87602/m4/541683</a> | <a href="http://n2t.net/ark:/87602/m4/541688">http://n2t.net/ark:/87602/m4/541688</a> |
| BE-RBINS-VER-REP-561    | <i>Malpolon monspessulanus monspessulanus</i> | <a href="http://n2t.net/ark:/87602/m4/541692">http://n2t.net/ark:/87602/m4/541692</a> | <a href="http://n2t.net/ark:/87602/m4/541694">http://n2t.net/ark:/87602/m4/541694</a> |
| BE-RBINS-VER-REP-6719   | <i>Lycodonomorphus inornatus</i>              | <a href="http://n2t.net/ark:/87602/m4/541699">http://n2t.net/ark:/87602/m4/541699</a> | <a href="http://n2t.net/ark:/87602/m4/541906">http://n2t.net/ark:/87602/m4/541906</a> |



|                            |                                             |                                                                                       |                                                                                       |
|----------------------------|---------------------------------------------|---------------------------------------------------------------------------------------|---------------------------------------------------------------------------------------|
| BE-RBINS-VER-<br>REP-5069  | <i>Rhamphiophis rostratus</i>               | <a href="http://n2t.net/ark:/87602/m4/541703">http://n2t.net/ark:/87602/m4/541703</a> | <a href="http://n2t.net/ark:/87602/m4/541908">http://n2t.net/ark:/87602/m4/541908</a> |
| BE-RBINS-VER-<br>REP-18633 | <i>Kladirostratus acutus</i>                | <a href="http://n2t.net/ark:/87602/m4/541712">http://n2t.net/ark:/87602/m4/541712</a> | <a href="http://n2t.net/ark:/87602/m4/541910">http://n2t.net/ark:/87602/m4/541910</a> |
| BE-RMCA-VER-<br>R.11       | <i>Prosymna ambigua bocagei</i><br>Holotype | <a href="http://n2t.net/ark:/87602/m4/541707">http://n2t.net/ark:/87602/m4/541707</a> | <a href="http://n2t.net/ark:/87602/m4/541914">http://n2t.net/ark:/87602/m4/541914</a> |
| BE-RBINS-VER-<br>REP-11733 | <i>Prosymna sundevalli</i>                  | <a href="http://n2t.net/ark:/87602/m4/541881">http://n2t.net/ark:/87602/m4/541881</a> | <a href="http://n2t.net/ark:/87602/m4/541912">http://n2t.net/ark:/87602/m4/541912</a> |
